# Supplementary material for: Meteorological influence on surface ozone trends in China: Assessing uncertainties caused by multi-dataset and multi-method
Source: Copernicus journal article supplement (doi:10.5194/egusphere-2025-1880), 2025-05-19
Supplement: Supplementary file 1 [file egusphere-2025-1880-supplement.pdf]

*Supplemental Information for*

## **Meteorological influence on surface ozone trends in China: Assessing uncertainties caused by multi-dataset and multi-method**

Xueqing Wang<sup>1</sup>, Jia Zhu<sup>1\*</sup>, Guanjie Jiao<sup>1</sup>, Xi Chen<sup>1</sup>, Zhenjiang Yang<sup>1</sup>, Lei Chen<sup>1,2</sup>,  
Xipeng Jin<sup>1</sup>, and Hong Liao<sup>1</sup>

<sup>1</sup>Jiangsu Key Laboratory of Atmospheric Environment Monitoring and Pollution Control, Jiangsu  
Collaborative Innovation Centre of Atmospheric Environment and Equipment Technology, Joint  
International Research Laboratory of Climate and Environment Change, School of Environmental  
Science and Engineering, Nanjing University of Information Science and Technology, Nanjing, 210044,  
China

<sup>2</sup>State Environmental Protection Key Laboratory of Sources and Control of Air Pollution Complex,  
Beijing, China

*Correspondence:* Jia Zhu (jiazhu@nuist.edu.cn)

## **Abbreviations<sup>1</sup>**

---

<sup>1</sup> Abbreviations:

CMA: China Meteorological Administration

ECMWF: European Centre for Medium-Range Weather Forecasts

ERA5: The fifth generation ECMWF atmospheric reanalysis of the global climate

ERA-Interim: ECMWF Reanalysis - Interim

FNL: National Centers for Environmental Prediction Final Operational Global Analysis data  
(1.0°×1.0°)

FNL025: National Centers for Environmental Prediction Final Operational Global Analysis data  
(0.25°×0.25°)

MERRA2: Modern-Era Retrospective analysis for Research and Applications Version 2

KZ: Kolmogorov–Zurbenko filter

MLR: Multiple Linear Regression

RF: Random Forest

XGBoost: eXtreme Gradient Boosting

LightGBM: Light Gradient Boosting Machine

Lowess: Locally Weighted Linear Regression

GEOS: Goddard Earth Observing System

WRF: Weather Research and Forecast

CMAQ: Community Multiscale Air Quality

WRF-Chem: WRF model coupled with Chemistry

RegCM-Chem-YIBs: Regional Climate-Chemistry-Ecology Coupling Model

NCP: North China Plain

BTH: Beijing-Tianjin-Hebei Region

YRD: Yangtze River Delta Region

PRD: Pearl River Delta

SCB: Sichuan Basin

FWP: Fenwei Plain

THB: Twain-Hu Basin

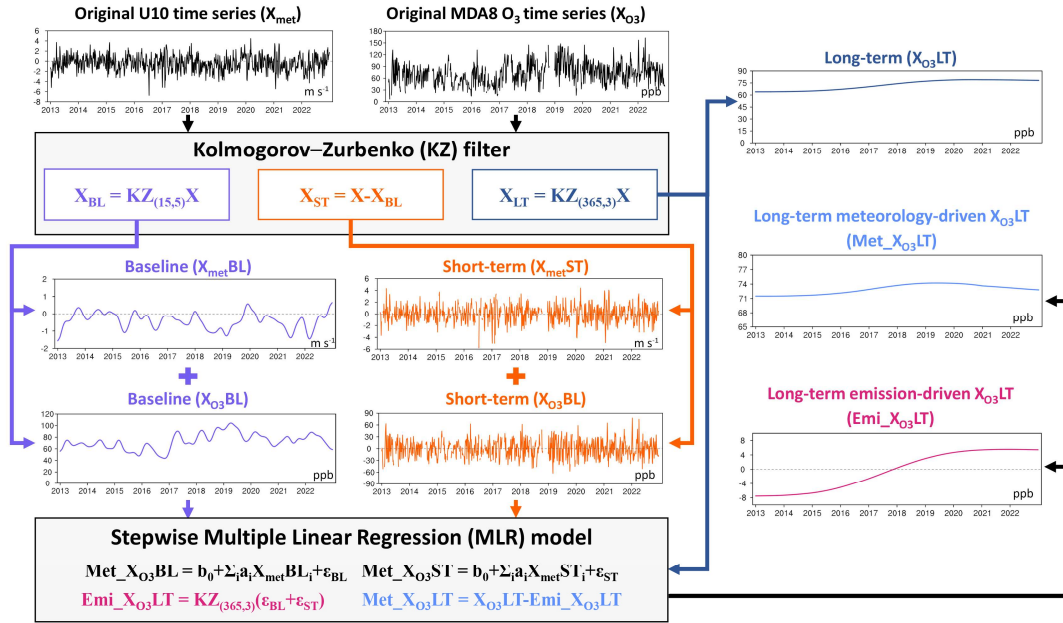

**Figure S1.** Flowchart of temporal decomposition of observed MDA8  $O_3$  time series into meteorology-driven and emission-driven long-term components (an example of the MDA8  $O_3$  data from Station\_1015A and U10 data from ERA5).

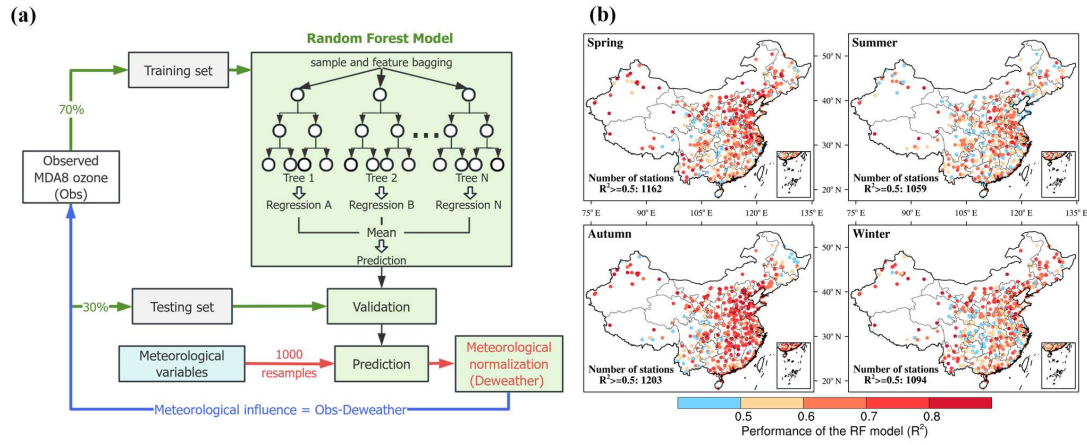

**Figure S2.** (a) Conceptual diagram of obtaining the meteorological influence based on the Random Forest (RF) algorithm, and (b) the performance of the RF model for the testing dataset at each state-controlled station during four seasons. The number of state-controlled monitoring stations with the coefficient of determination ( $R^2$ ) greater than or equal to 0.5 is also presented.

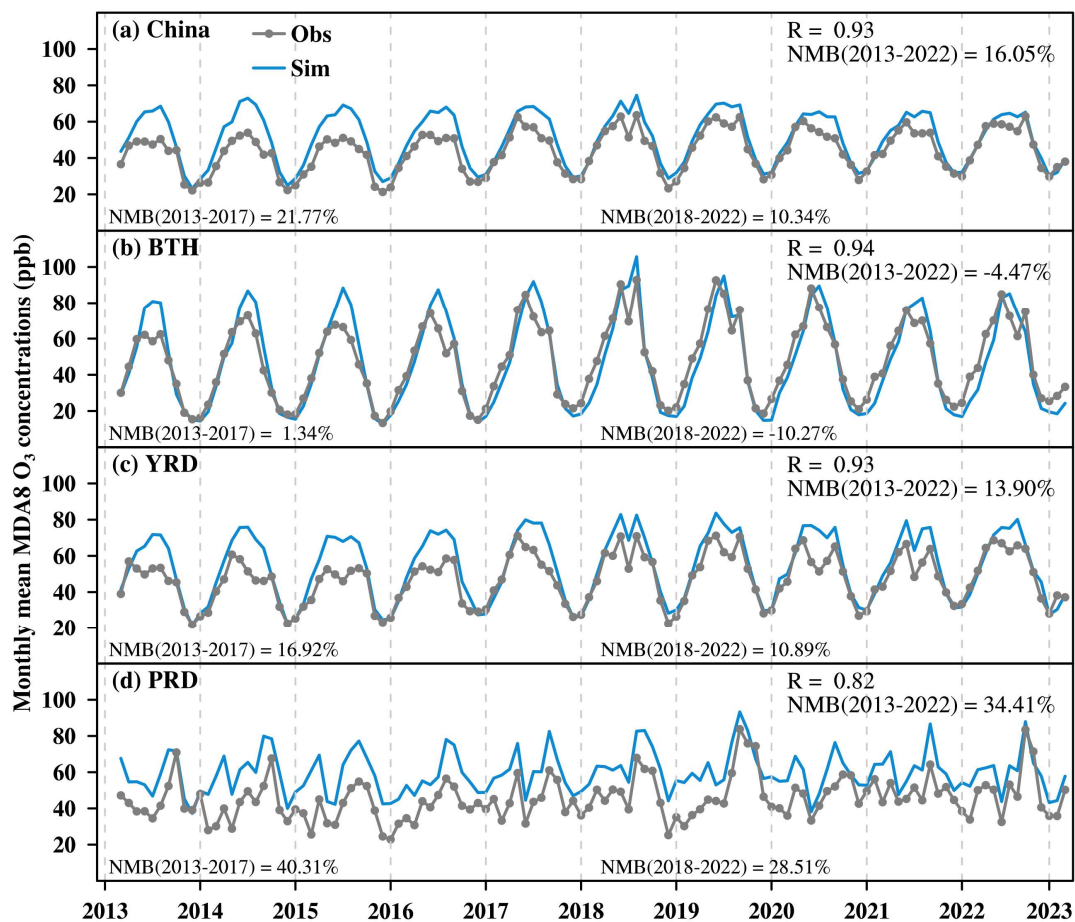

**Figure S3.** Comparison of simulated (blue) and observed (grey) monthly mean MDA8 O<sub>3</sub> concentrations averaged over (a) China, (b) BTH, (c) YRD, and (d) PRD from 2013 to 2022. The correlation coefficient (R) and normalized mean bias (NMB) values are shown. The NMB for 2013–2017 and 2018–2022 are also calculated and shown in order to test the performance of GEOS-Chem at different time periods.

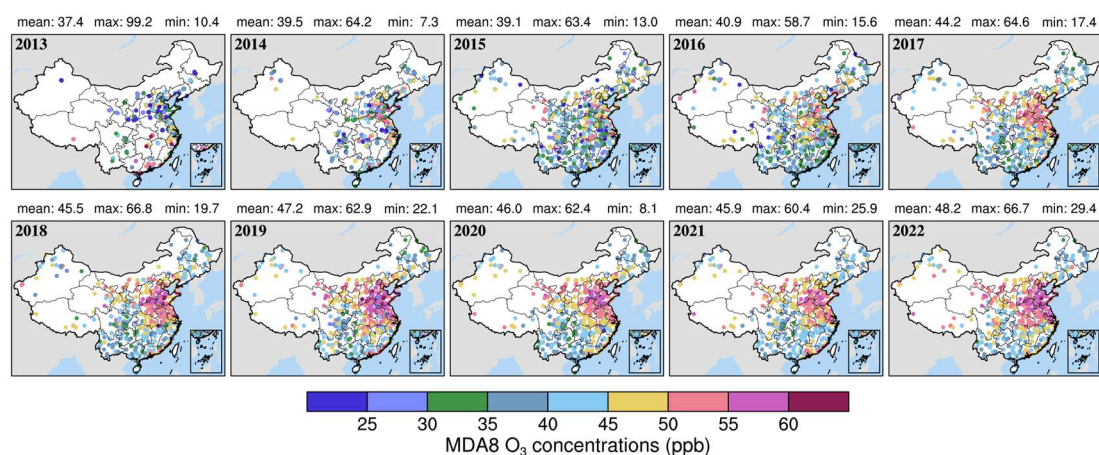

**Figure S4.** Annual mean MDA8 O<sub>3</sub> concentrations in China from 2013 to 2022. The mean, maximum, and minimum MDA8 O<sub>3</sub> concentrations for the whole China are shown.



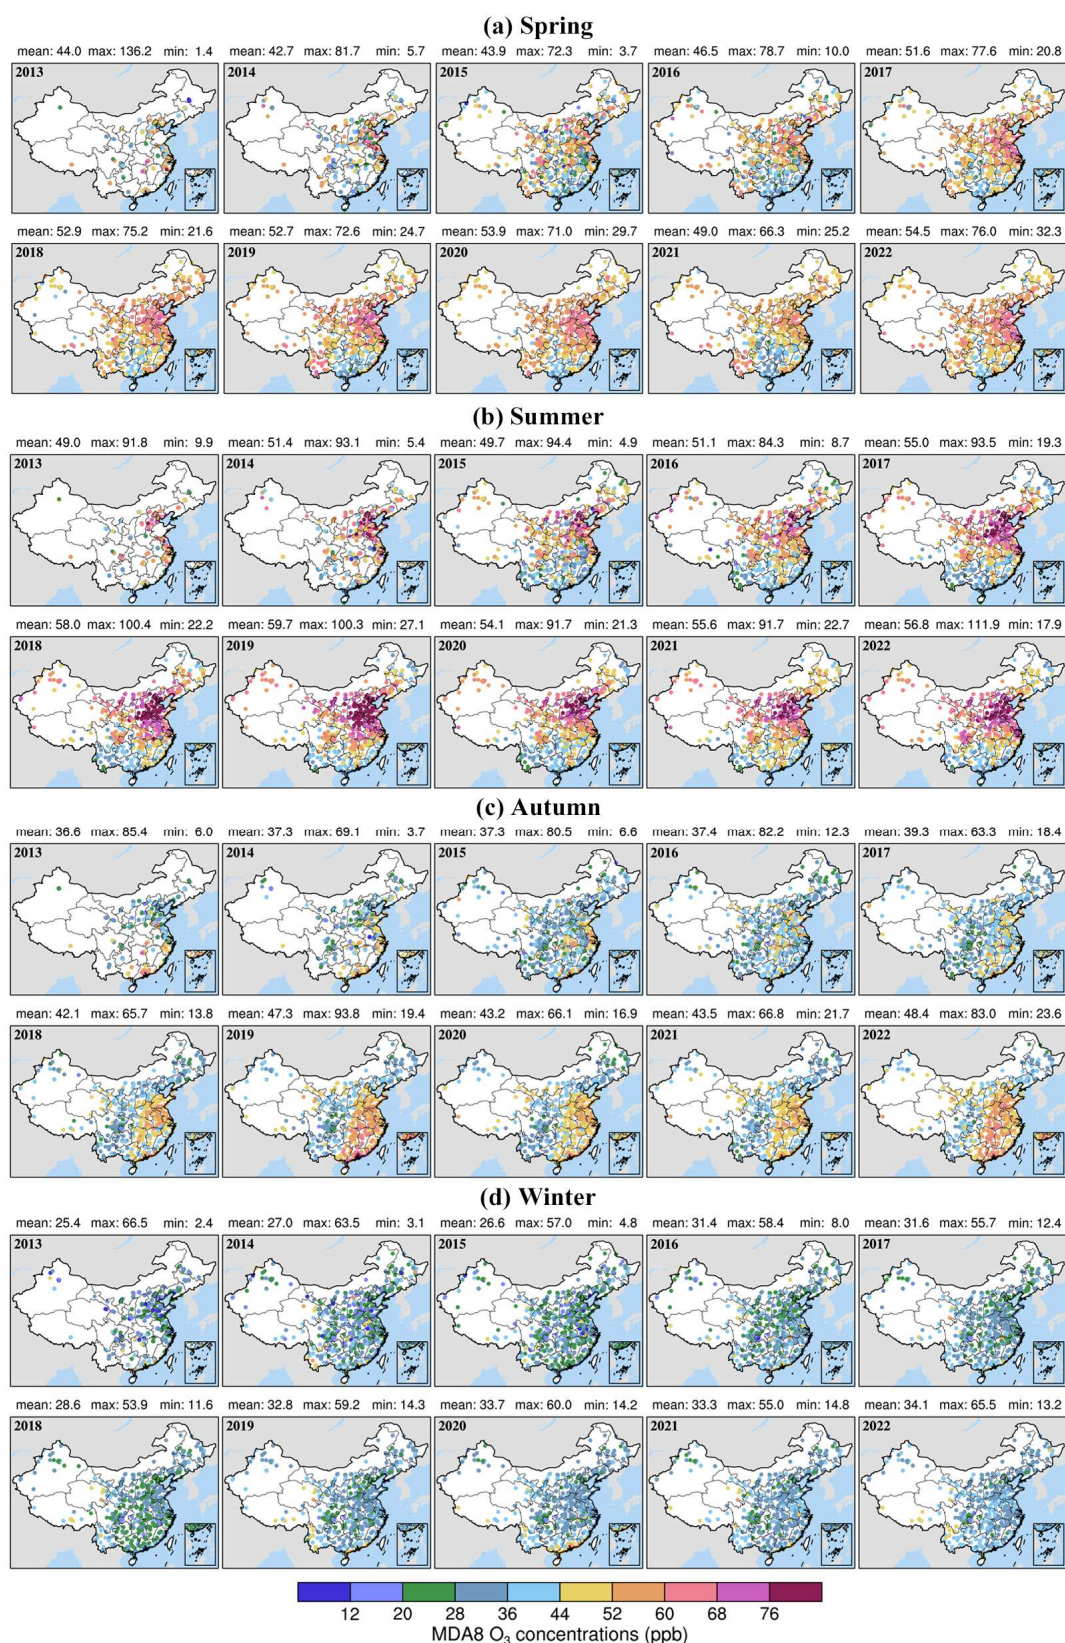

**Figure S5.** Seasonal mean MDA8 O<sub>3</sub> concentrations in China during (a) spring, (b) summer, (c) autumn, and (d) winter. The mean, maximum, and minimum MDA8 O<sub>3</sub> concentrations for the whole China are shown.

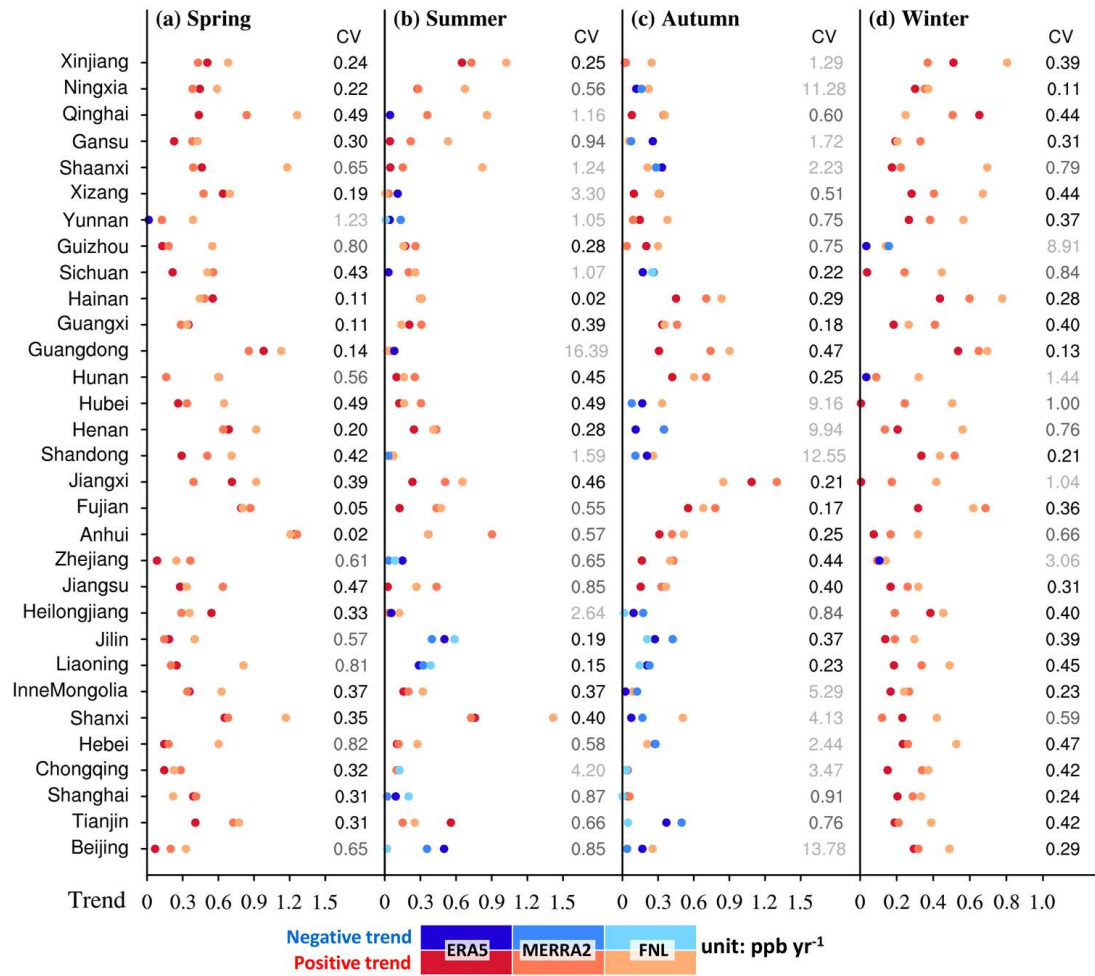

**Figure S6.** Trends in meteorology-driven MDA8 O<sub>3</sub> concentrations calculated by ERA5-, MERRA2-, and FNL-driven MLR models in China's 31 mainland provinces during (a) spring, (b) summer, (c) autumn, and (d) winter. Markers in red and blue represent the positive and negative trends, respectively. The absolute value of coefficient of variation (CV) are shown. The CV is calculated by the standard deviation of trends derived from ERA5-, MERRA2-, and FNL-driven MLR models divided by the mean. The darker colour means the lower uncertainty in quantifying the meteorological impact on observed O<sub>3</sub> trends.

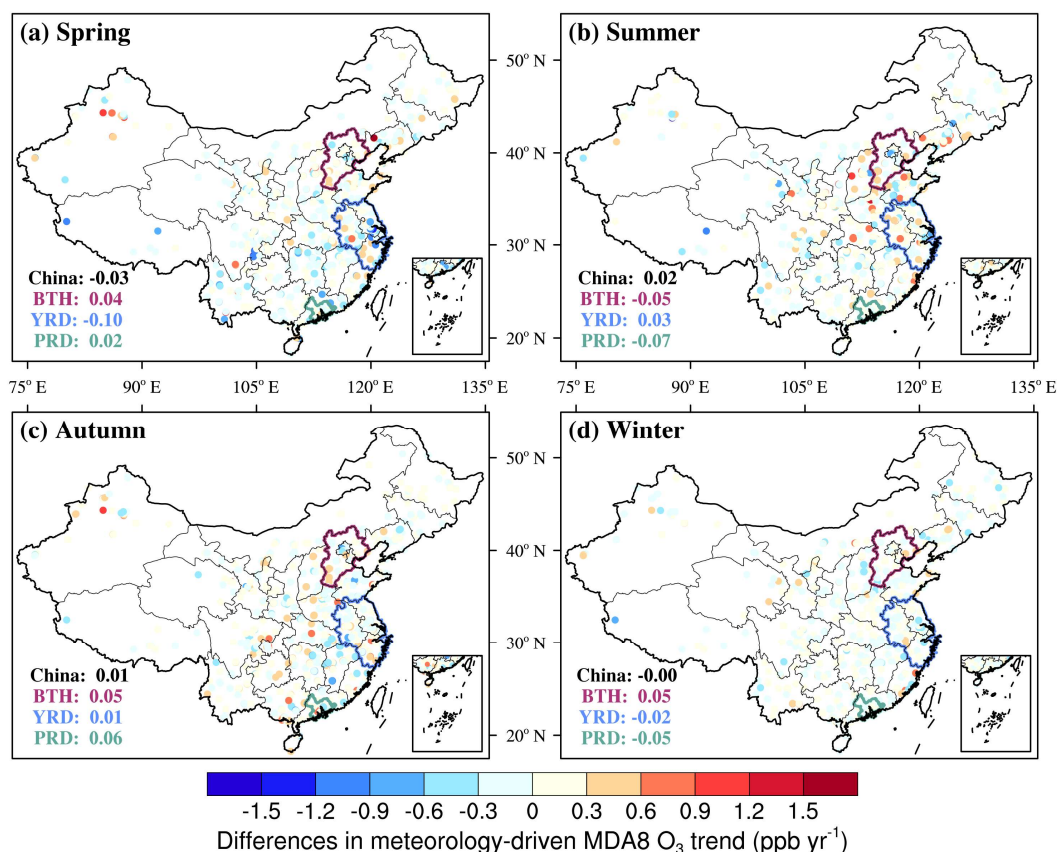

**Figure S7.** Differences between meteorology-driven MDA8 O<sub>3</sub> trends calculated by FNL- and FNL025-driven MLR model in China during (a) spring, (b) summer, (c) autumn, and (d) winter. Values in black, purple, blue, and green represent the average difference for the whole China, BTH, YRD, and PRD, respectively.



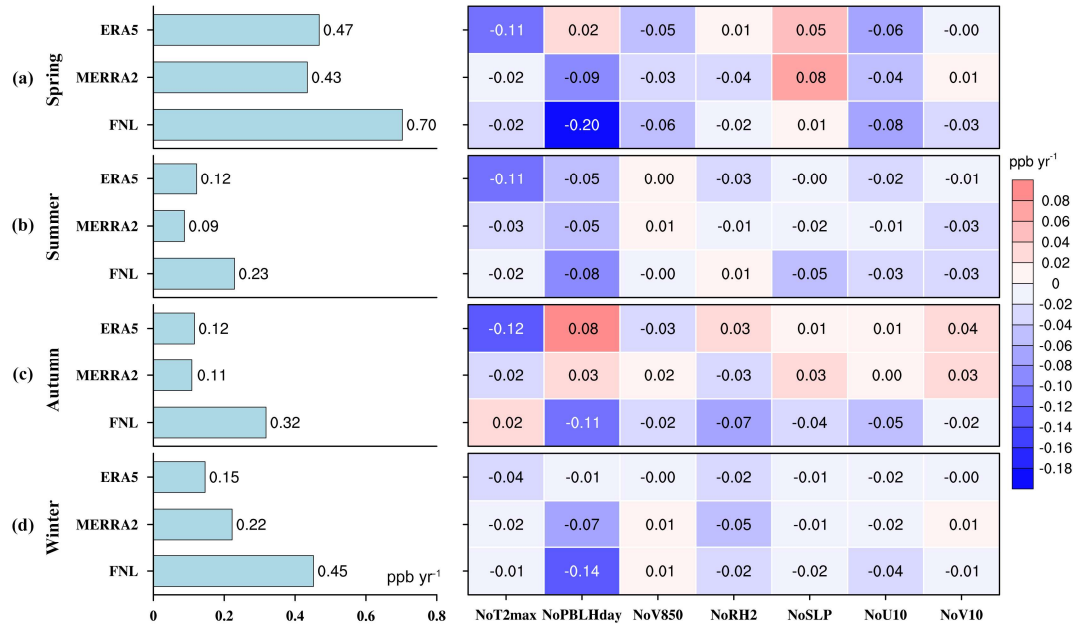

**Figure S8.** Construction of a multiple linear regression (MLR) model using seven common meteorological variables (i.e. T2max, PBLHday, V850, RH2, SLP, U10, V10) from ERA5, MERRA2, and FNL to quantify the meteorological influence on the MDA8 O<sub>3</sub> trends during (a) spring, (b) summer, (c) autumn, and (d) winter. Bars on the left represent the meteorology-driven O<sub>3</sub> trends derived from the three data-driven MLR models. The heatmap on the right represents the difference between the results obtained by constructing an MLR model after removing a certain meteorological variable in sequence.

### Meteorology-driven MDA8 O<sub>3</sub> trend from MLR and GC

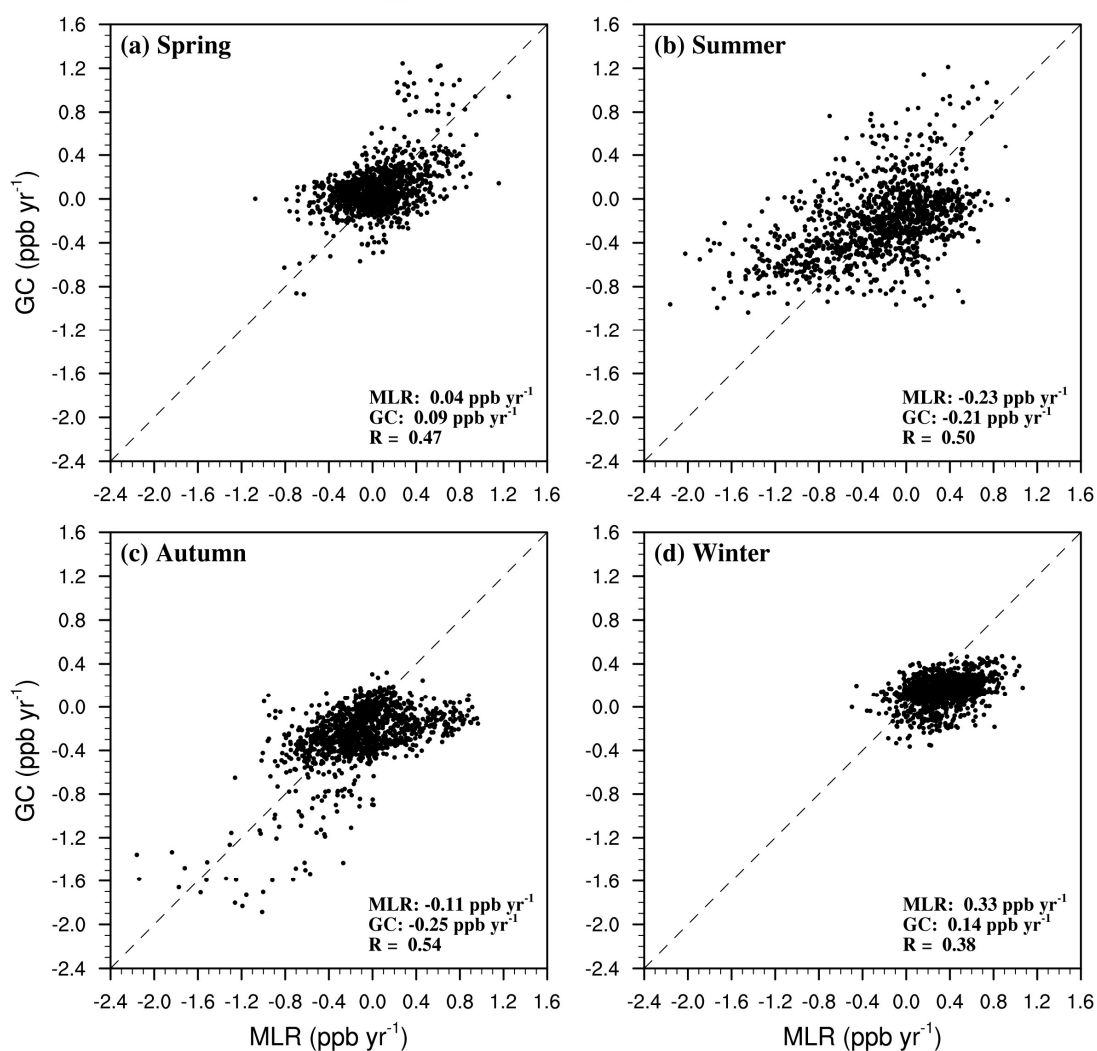

**Figure S9.** The comparison of meteorology-driven O<sub>3</sub> trends from the MERRA2-driven multiple linear regression (MLR) vs. GEOS-Chem (GC) model averaged over China for 2018–2022 during (a) spring, (b) summer, (c) autumn, and (d) winter. The dashed line is a 1:1 line. Coefficient of correlation (R) is also shown.

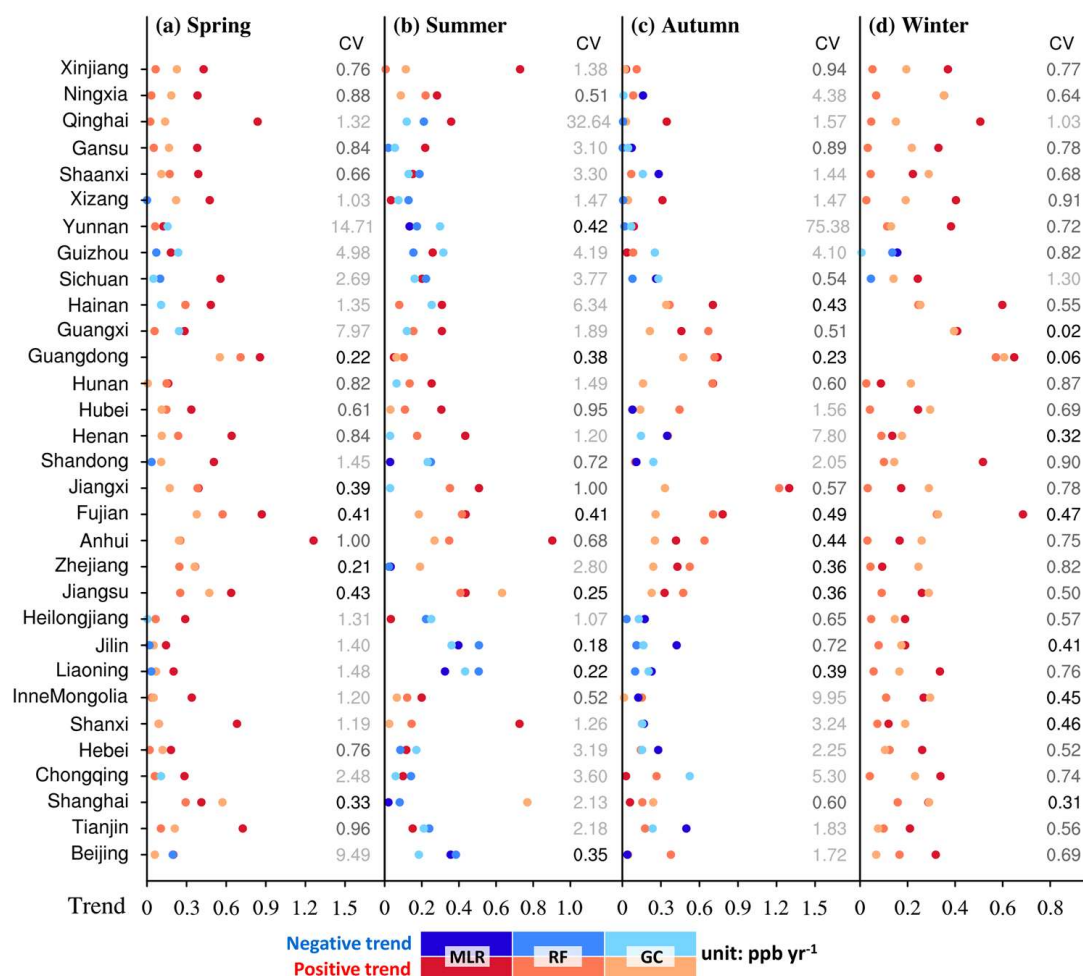

**Figure S10.** Trends in meteorology-driven MDA8 O<sub>3</sub> concentrations calculated by multiple linear regression (MLR), random forest (RF), and GEOS-Chem (GC) models in China's 31 mainland provinces during (a) spring, (b) summer, (c) autumn, and (d) winter. Markers in red and blue represent the positive and negative trends, respectively. The CV is calculated by the standard deviation of the trends derived from MLR, RF, and GC models divided by the mean. The darker colour means the lower uncertainty in quantifying the meteorological impact on observed O<sub>3</sub> trends.

**Table S1.** Reported studies using traditional statistical, machine learning, and chemical transport models to obtain the meteorological impact on surface O<sub>3</sub> in the past six years.

| Region/City         | Study period <sup>a</sup> | Model                      | Meteorological data | Meteorological impact <sup>b</sup>         | Reference          |
|---------------------|---------------------------|----------------------------|---------------------|--------------------------------------------|--------------------|
| Shanghai            | 2013–2017                 | KZ                         | N/A                 | +0.75 $\mu\text{g m}^{-3} \text{ yr}^{-1}$ | Yu et al., 2019    |
| Tianjin             | Spring, 2009–2015         | Generalized additive model | Site observation    | –1.11 ppb $\text{yr}^{-1}$                 | Yang et al., 2019a |
|                     | Summer, 2009–2015         |                            |                     | +0.12 ppb $\text{yr}^{-1}$                 |                    |
|                     | Autumn, 2009–2015         |                            |                     | –0.99 ppb $\text{yr}^{-1}$                 |                    |
|                     | Winter, 2009–2015         |                            |                     | +0.06 ppb $\text{yr}^{-1}$                 |                    |
| PRD                 | 2007–2017                 | KZ-MLR                     | ECMWF reanalysis    | –0.8 $\mu\text{g m}^{-3} \text{ yr}^{-1}$  | Yang et al., 2019b |
| North China         | Apr to Sept, 2013/2017    | WRF-CMAQ                   | N/A                 | +0.2±1.1 ppb                               | Ding et al., 2019  |
| Northeast China     |                           |                            |                     | +0.3±0.8 ppb                               |                    |
| East China          |                           |                            |                     | +2.0±1.7 ppb                               |                    |
| South China         |                           |                            |                     | +0.5±1.5 ppb                               |                    |
| China               | Summer, 2013/2014         | WRF-CMAQ                   | FNL                 | –3.2 ppb                                   | Wang et al., 2019  |
| North China         |                           |                            |                     | –8.7 ppb                                   |                    |
| Northeast China     |                           |                            |                     | –4.5 ppb                                   |                    |
| East China          |                           |                            |                     | –1.1 ppb                                   |                    |
| South central China |                           |                            |                     | –1.5 ppb                                   |                    |
| Southwest China     |                           |                            |                     | –3.7 ppb                                   |                    |
| Northwest China     |                           |                            |                     | –1.6 ppb                                   |                    |
| China               | Summer, 2013/2015         | WRF-CMAQ                   | FNL                 | –1.8 ppb                                   | Wang et al., 2019  |
| North China         |                           |                            |                     | –2.4 ppb                                   |                    |
| Northeast China     |                           |                            |                     | –0.5 ppb                                   |                    |
| East China          |                           |                            |                     | –2.1 ppb                                   |                    |
| South central China |                           |                            |                     | –4.2 ppb                                   |                    |
| Southwest China     |                           |                            |                     | +0.2 ppb                                   |                    |
| Northwest China     |                           |                            |                     | –0.9 ppb                                   |                    |

| Region/City           | Study period      | Model     | Meteorological data | Meteorological impact                                                      | Reference          |
|-----------------------|-------------------|-----------|---------------------|----------------------------------------------------------------------------|--------------------|
| Central eastern China | 2003/2015         | GEOS-Chem | MERRA2              | +3.2 ppb                                                                   | Sun et al., 2019   |
| Eastern China         |                   |           |                     | +0.5 $\mu\text{g m}^{-3} \text{ yr}^{-1}$                                  |                    |
| BTH                   | Summer, 2013–2018 | MLR       | FNL                 | +0.7 $\mu\text{g m}^{-3} \text{ yr}^{-1}$                                  | Han et al., 2020   |
| YRD                   |                   |           |                     | +0.9 $\mu\text{g m}^{-3} \text{ yr}^{-1}$                                  |                    |
| PRD                   |                   |           |                     | +0.7 $\mu\text{g m}^{-3} \text{ yr}^{-1}$                                  |                    |
| Eastern China         |                   |           |                     | +0.7 ppb $\text{yr}^{-1}$                                                  |                    |
| NCP                   | Summer, 2013–2019 | MLR       | MERRA2              | +1.4 ppb $\text{yr}^{-1}$                                                  | Li et al., 2020    |
| YRD                   |                   |           |                     | +0.7 ppb $\text{yr}^{-1}$                                                  |                    |
| PRD                   |                   |           |                     | +0.8 ppb $\text{yr}^{-1}$                                                  |                    |
| SCB                   |                   |           |                     | −0.2 ppb $\text{yr}^{-1}$                                                  |                    |
| China                 | Summer, 2013–2017 | WRF-CMAQ  | FNL                 | Meteorological changes dominated<br>the changing rates of O <sub>3</sub> . | Liu and Wang, 2020 |
| NCP                   | 2014–2018         | MLR       | ERA-Interim         | +0.7 $\mu\text{g m}^{-3} \text{ yr}^{-1}$                                  | Chen et al., 2020  |
| YRD                   |                   |           |                     | +0.7 $\mu\text{g m}^{-3} \text{ yr}^{-1}$                                  |                    |
| FWP                   |                   |           |                     | +0.8 $\mu\text{g m}^{-3} \text{ yr}^{-1}$                                  |                    |
| NCP                   | Spring, 2014–2018 |           |                     | +0.5 $\mu\text{g m}^{-3} \text{ yr}^{-1}$                                  |                    |
| YRD                   |                   |           |                     | +1.3 $\mu\text{g m}^{-3} \text{ yr}^{-1}$                                  |                    |
| FWP                   |                   |           |                     | +1.1 $\mu\text{g m}^{-3} \text{ yr}^{-1}$                                  |                    |
| NCP                   | Summer, 2014–2018 |           |                     | +0.8 $\mu\text{g m}^{-3} \text{ yr}^{-1}$                                  |                    |
| YRD                   |                   |           |                     | +1.1 $\mu\text{g m}^{-3} \text{ yr}^{-1}$                                  |                    |
| FWP                   |                   |           |                     | +0.8 $\mu\text{g m}^{-3} \text{ yr}^{-1}$                                  |                    |
| NCP                   | Autumn, 2014–2018 |           |                     | +1.0 $\mu\text{g m}^{-3} \text{ yr}^{-1}$                                  |                    |
| YRD                   |                   |           |                     | +0.8 $\mu\text{g m}^{-3} \text{ yr}^{-1}$                                  |                    |
| FWP                   |                   |           |                     | +1.1 $\mu\text{g m}^{-3} \text{ yr}^{-1}$                                  |                    |



| Region/City | Study period          | Model             | Meteorological data | Meteorological impact                      | Reference                  |
|-------------|-----------------------|-------------------|---------------------|--------------------------------------------|----------------------------|
| NCP         | Winter, 2014–2018     | MLR               | ERA-Interim         | +0.7 $\mu\text{g m}^{-3} \text{ yr}^{-1}$  | Chen et al., 2020          |
| YRD         |                       |                   |                     | −0.5 $\mu\text{g m}^{-3} \text{ yr}^{-1}$  |                            |
| FWP         |                       |                   |                     | +0.1 $\mu\text{g m}^{-3} \text{ yr}^{-1}$  |                            |
| NCP         | Summer, 2012–2017     | GEOS-Chem         | MERRA2              | +0.28 ppb $\text{yr}^{-1}$                 | Dang et al., 2021          |
| YRD         |                       |                   |                     | +1.47 ppb $\text{yr}^{-1}$                 |                            |
| BTH         | 2015–2019             | KZ-MLR            | ERA5, FNL           | +1.07 $\mu\text{g m}^{-3} \text{ yr}^{-1}$ | Mousavinezhad et al., 2021 |
| YRD         |                       |                   |                     | +0.99 $\mu\text{g m}^{-3} \text{ yr}^{-1}$ |                            |
| PRD         |                       |                   |                     | +2.52 $\mu\text{g m}^{-3} \text{ yr}^{-1}$ |                            |
| SCB         |                       |                   |                     | −1.35 $\mu\text{g m}^{-3} \text{ yr}^{-1}$ |                            |
| Shandong    | Spring, 2013/2015     | WRF-Chem          | FNL                 | +8.6%                                      | Zhao et al., 2021          |
|             | Spring, 2013/2017     |                   |                     | +14.5%                                     |                            |
|             | Spring, 2013/2019     |                   |                     | +14.0%                                     |                            |
|             | Summer, 2013/2015     |                   |                     | −7.4%                                      |                            |
|             | Summer, 2013/2017     |                   |                     | −6.5%                                      |                            |
|             | Summer, 2013/2019     |                   |                     | −6.2%                                      |                            |
|             | Autumn, 2013/2015     |                   |                     | +6.9%                                      |                            |
|             | Autumn, 2013/2017     |                   |                     | +11.6%                                     |                            |
|             | Autumn, 2013/2019     |                   |                     | +9.6%                                      |                            |
|             | Winter, 2013/2015     |                   |                     | −1.2%                                      |                            |
|             | Winter, 2013/2017     |                   |                     | −0.2%                                      |                            |
|             | Winter, 2013/2019     |                   |                     | −0.5%                                      |                            |
| SCB         | May to Jun, 2019/2020 | GEOS-Chem         | GEOS-FP             | 11.57 ppb                                  | Sun et al., 2021           |
|             |                       | GEOS-Chem-XGBoost |                     | 11.15 ppb                                  |                            |
| Handan      | Jun, 2013–2018        | WRF-CMAQ          | FNL                 | +2.00 $\mu\text{g m}^{-3} \text{ yr}^{-1}$ | Yao et al., 2021           |

| Region/City               | Study period                                            | Model                                         | Meteorological data               | Meteorological impact                                                                                              | Reference         |
|---------------------------|---------------------------------------------------------|-----------------------------------------------|-----------------------------------|--------------------------------------------------------------------------------------------------------------------|-------------------|
| Eastern China             | May to Aug, 2019/2020                                   | GEOS-Chem                                     | GEOS-FP                           | −2.9 ppb                                                                                                           | Yin et al., 2021  |
| BTH                       |                                                         |                                               |                                   | −1.4 ppb                                                                                                           |                   |
| FWP                       |                                                         |                                               |                                   | −3.2 ppb                                                                                                           |                   |
| YRD                       |                                                         |                                               |                                   | −3.2 ppb                                                                                                           |                   |
| Eastern China             |                                                         | GEOS-Chem-XGBoost                             |                                   | −2.3 ppb                                                                                                           |                   |
| BTH                       |                                                         |                                               |                                   | −2.2 ppb                                                                                                           |                   |
| FWP                       |                                                         |                                               |                                   | −2.2 ppb                                                                                                           |                   |
| YRD                       |                                                         |                                               |                                   | −2.7 ppb                                                                                                           |                   |
| Eastern and central China | Summer, 2013/2020                                       | 4-D meteorology-pollution decomposition model | World Meteorological Organization | Meteorology reduced the O <sub>3</sub> concentrations.                                                             | Lin et al., 2021  |
| YRD                       | Apr to Sept, 2014–2018                                  | KZ-MLR                                        | CMA                               | Meteorology decreased (increased) O <sub>3</sub> from 2014 to the middle of 2016 (from the middle of 2016 to 2018) | Gao et al., 2021a |
| Eastern China             | May, Jul, Sept, Dec, 2013/2017                          | WRF-Chem                                      | FNL                               | −8.1 ~ +21.3 µg m <sup>−3</sup>                                                                                    | Li et al., 2021   |
| NCP                       | May 1 <sup>st</sup> to Jun 10 <sup>th</sup> , 2014–2019 | MLR                                           | FNL                               | +1.8 ppb yr <sup>−1</sup>                                                                                          | Gao et al., 2021b |
|                           | Jun 11th to Jul 15th, 2014–2019                         |                                               |                                   | +2.4 ppb yr <sup>−1</sup>                                                                                          |                   |
|                           | Jul 16th to Aug 31st, 2014–2019                         |                                               |                                   | −0.4 ppb yr <sup>−1</sup>                                                                                          |                   |
| PRD (urban site)          | 2006–2019                                               | MLR                                           | ERA5                              | −0.04 ppb yr <sup>−1</sup>                                                                                         | Li et al., 2022   |
| PRD (regional site)       |                                                         |                                               |                                   | −0.11 ppb yr <sup>−1</sup>                                                                                         |                   |
| Beijing                   | 2013–2020                                               | MLR                                           | CMA, ERA5                         | +2.15 µg m <sup>−3</sup> yr <sup>−1</sup>                                                                          | Gong et al., 2022 |

| Region/City | Study period          | Model            | Meteorological data           | Meteorological impact                     | Reference          |
|-------------|-----------------------|------------------|-------------------------------|-------------------------------------------|--------------------|
| Beijing     | 2015–2020             | KZ-MLR           | National Climatic Data Center | +45%                                      | Zhang et al., 2022 |
| Shenzhen    |                       |                  |                               | +20%                                      |                    |
| Wuhan       |                       |                  |                               | +60%                                      |                    |
| Nanjing     |                       |                  |                               | +75%                                      |                    |
| YRD         | Summer, 2015–2019     | MLR              | MERRA2                        | +5.0 μg m <sup>−3</sup> yr <sup>−1</sup>  | Qian et al., 2022  |
| Shanghai    |                       |                  |                               | +1.0 μg m <sup>−3</sup> yr <sup>−1</sup>  |                    |
| Nanjing     |                       |                  |                               | +11.3 μg m <sup>−3</sup> yr <sup>−1</sup> |                    |
| Hangzhou    |                       |                  |                               | +1.9 μg m <sup>−3</sup> yr <sup>−1</sup>  |                    |
| Heifei      |                       |                  |                               | +6.0 μg m <sup>−3</sup> yr <sup>−1</sup>  |                    |
| BTH         |                       | RF               |                               | +0.74 ppb yr <sup>−1</sup>                |                    |
| YRD         |                       |                  |                               | +1.35 ppb yr <sup>−1</sup>                |                    |
| PRD         |                       |                  |                               | −0.75 ppb yr <sup>−1</sup>                |                    |
| Sichuan     |                       |                  |                               | −0.91 ppb yr <sup>−1</sup>                |                    |
| BTH         | Summer, 2015–2019     | Ridge regression | ERA5                          | +0.54 ppb yr <sup>−1</sup>                | Weng et al., 2022  |
| YRD         |                       |                  |                               | +1.38 ppb yr <sup>−1</sup>                |                    |
| PRD         |                       |                  |                               | −1.13 ppb yr <sup>−1</sup>                |                    |
| Sichuan     |                       |                  |                               | −0.84 ppb yr <sup>−1</sup>                |                    |
| BTH         |                       | MLR              |                               | +0.55 ppb yr <sup>−1</sup>                |                    |
| YRD         |                       |                  |                               | +1.42 ppb yr <sup>−1</sup>                |                    |
| PRD         |                       |                  |                               | −1.1 ppb yr <sup>−1</sup>                 |                    |
| Sichuan     |                       |                  |                               | −0.86 ppb yr <sup>−1</sup>                |                    |
| SCB         | Apr to Aug, 2016/2019 | WRF-CMAQ         | FNL                           | +6.4 μg m <sup>−3</sup>                   | Wu et al., 2022    |
|             | Jun to Aug, 2019/2020 |                  |                               | −12.6 μg m <sup>−3</sup>                  |                    |
| Tianjin     | 2015–2021             | Lowess and RF    | CMA                           | +2.1 μg m <sup>−3</sup> yr <sup>−1</sup>  | Ding et al., 2023  |

| Region/City     | Study period                  | Model                   | Meteorological data | Meteorological impact                        | Reference          |
|-----------------|-------------------------------|-------------------------|---------------------|----------------------------------------------|--------------------|
| BTH             | Summer,<br>2014–2021/2022     | RF                      | ERA5                | $-0.02 \pm 2.9 \mu\text{g m}^{-3}$           | Zheng et al., 2023 |
| FWP             |                               |                         |                     | $+7.23 \pm 5.97 \mu\text{g m}^{-3}$          |                    |
| THB             |                               |                         |                     | $+3.63 \pm 4.51 \mu\text{g m}^{-3}$          |                    |
| PRD             |                               |                         |                     | $-1.81 \pm 2.14 \mu\text{g m}^{-3}$          |                    |
| SCB             |                               |                         |                     | $+12.24 \pm 4.07 \mu\text{g m}^{-3}$         |                    |
| YRD             |                               |                         |                     | $+10.92 \pm 3.24 \mu\text{g m}^{-3}$         |                    |
| Xiamen          | 2015–2020                     | KZ-MLR                  | ERA5                | $+2.71 \mu\text{g m}^{-3} \text{ yr}^{-1}$   | Ji et al., 2023    |
| Fuzhou          |                               |                         |                     | $+2.17 \mu\text{g m}^{-3} \text{ yr}^{-1}$   |                    |
| Longyan         |                               |                         |                     | $+0.76 \mu\text{g m}^{-3} \text{ yr}^{-1}$   |                    |
| Nanping         |                               |                         |                     | $+1.78 \mu\text{g m}^{-3} \text{ yr}^{-1}$   |                    |
| Northeast China | 2013–2021                     | KZ-MLR                  | ERA5                | $+0.1688 \mu\text{g m}^{-3} \text{ yr}^{-1}$ | Shang et al., 2023 |
| Liaoning        |                               |                         |                     | $-0.0864 \mu\text{g m}^{-3} \text{ yr}^{-1}$ |                    |
| Jilin           |                               |                         |                     | $+0.093 \mu\text{g m}^{-3} \text{ yr}^{-1}$  |                    |
| Heilongjiang    |                               |                         |                     | $+0.5562 \mu\text{g m}^{-3} \text{ yr}^{-1}$ |                    |
| Eastern China   | Apr to Sept, 2013/2020        | WRF-CMAQ                | FNL                 | $+3.60 \mu\text{g m}^{-3}$                   | Liu et al., 2023   |
| BTH             |                               |                         |                     | $+3.95 \mu\text{g m}^{-3}$                   |                    |
| YRD             |                               |                         |                     | $+3.91 \mu\text{g m}^{-3}$                   |                    |
| FWP             |                               |                         |                     | $+7.75 \mu\text{g m}^{-3}$                   |                    |
| Beijing         | 2013–2020                     | Observation-based model | CMA                 | $+0.52 \text{ ppb yr}^{-1}$                  | Pan et al., 2023   |
| Chengdu         |                               |                         |                     | $+0.57 \text{ ppb yr}^{-1}$                  |                    |
| Guangzhou       |                               |                         |                     | $+0.59 \text{ ppb yr}^{-1}$                  |                    |
| Shanghai        |                               |                         |                     | $+0.62 \text{ ppb yr}^{-1}$                  |                    |
| NCP             | May to Aug,<br>2008/2009–2013 | RegCM-Chem-YIBs         | N/A                 | $-0.88 \text{ ppb}$                          | Ma et al., 2023    |
| FWP             |                               |                         |                     | $-1.41 \text{ ppb}$                          |                    |
| YRD             |                               |                         |                     | $-1.03 \text{ ppb}$                          |                    |

| Region/City         | Study period                  | Model                      | Meteorological data | Meteorological impact                                                                                                                                                                                       | Reference         |
|---------------------|-------------------------------|----------------------------|---------------------|-------------------------------------------------------------------------------------------------------------------------------------------------------------------------------------------------------------|-------------------|
| PRD                 | May to Aug,                   | RegCM-Chem-YIBs            | N/A                 | −0.23 ppb                                                                                                                                                                                                   | Ma et al., 2023   |
| SCB                 | 2008/2009–2013                |                            |                     | −0.41 ppb                                                                                                                                                                                                   |                   |
| NCP                 | May to Aug,<br>2008/2014–2018 |                            |                     | −0.04 ppb                                                                                                                                                                                                   |                   |
| FWP                 |                               |                            |                     | −0.09 ppb                                                                                                                                                                                                   |                   |
| YRD                 |                               |                            |                     | −0.96 ppb                                                                                                                                                                                                   |                   |
| PRD                 |                               |                            |                     | −1.08 ppb                                                                                                                                                                                                   |                   |
| SCB                 |                               |                            |                     | +0.71 ppb                                                                                                                                                                                                   |                   |
| NCP                 | Summer, 2015–2019             | GEOS-Chem                  | MERRA2              | +0.26 ppb yr <sup>−1</sup>                                                                                                                                                                                  | Wang et al., 2024 |
|                     |                               | XGBoost                    |                     | +0.19 ppb yr <sup>−1</sup>                                                                                                                                                                                  |                   |
|                     |                               | Deep learning model        |                     | +0.14 ppb yr <sup>−1</sup>                                                                                                                                                                                  |                   |
|                     | Summer, 2019–2021             | GEOS-Chem                  |                     | −0.74 ppb yr <sup>−1</sup>                                                                                                                                                                                  |                   |
|                     |                               | XGBoost                    |                     | −1.55 ppb yr <sup>−1</sup>                                                                                                                                                                                  |                   |
| Deep learning model |                               | −1.74 ppb yr <sup>−1</sup> |                     |                                                                                                                                                                                                             |                   |
| China               | 2015–2022                     | KZ-XGBoost                 | ERA5                | Meteorology increased O <sub>3</sub> .                                                                                                                                                                      | Yao et al., 2024  |
| Eastern China       | 2019/2021                     | GEOS-Chem                  | MERRA2              | −7.3 µg m <sup>−3</sup>                                                                                                                                                                                     | Ni et al., 2024   |
|                     |                               | LightGBM                   |                     | −6.8 µg m <sup>−3</sup>                                                                                                                                                                                     |                   |
| BTH                 | 2015–2022                     | XGBoost                    | ERA5                | Meteorology led a slight O <sub>3</sub> increase.                                                                                                                                                           | Luo et al., 2024  |
|                     | Spring, 2015–2022             |                            |                     | Meteorology increased O <sub>3</sub> by 8.2 µg m <sup>−3</sup> /0.01 µg m <sup>−3</sup> /2.7 µg m <sup>−3</sup> in spring/summer/winter, and decreased O <sub>3</sub> by −0.3 µg m <sup>−3</sup> in autumn. |                   |
|                     | Summer, 2015–2022             |                            |                     |                                                                                                                                                                                                             |                   |
|                     | Autumn, 2015–2022             |                            |                     |                                                                                                                                                                                                             |                   |
|                     | Winter, 2015–2022             |                            |                     |                                                                                                                                                                                                             |                   |
| China               | Summer, 2013–2022             | MLR                        | ERA5                | +0.2 µg m <sup>−3</sup> yr <sup>−1</sup>                                                                                                                                                                    | Yan et al., 2024  |
| BTH                 | Summer, 2013–2019             |                            |                     | +0.9 µg m <sup>−3</sup> yr <sup>−1</sup>                                                                                                                                                                    |                   |
| YRD                 |                               |                            |                     | −0.3 µg m <sup>−3</sup> yr <sup>−1</sup>                                                                                                                                                                    |                   |



| Region/City | Study period      | Model    | Meteorological data | Meteorological impact                                                                                | Reference        |
|-------------|-------------------|----------|---------------------|------------------------------------------------------------------------------------------------------|------------------|
| BTH         | Summer, 2019–2021 | MLR      | ERA5                | $-3.9 \mu\text{g m}^{-3} \text{ yr}^{-1}$                                                            | Yan et al., 2024 |
| YRD         |                   |          |                     | $-4.1 \mu\text{g m}^{-3} \text{ yr}^{-1}$                                                            |                  |
| BTH         | Summer, 2021–2022 |          |                     | $+4.3 \mu\text{g m}^{-3} \text{ yr}^{-1}$                                                            |                  |
| YRD         |                   |          |                     | $+10.4 \mu\text{g m}^{-3} \text{ yr}^{-1}$                                                           |                  |
| YRD         | 2016–2023         | KZ-MLR   | ERA5                | Meteorology decreased (increased) O <sub>3</sub> in 2016, 2020, 2021, 2023 (2017–2019, 2022).        | Hu et al., 2024  |
|             | Spring, 2016–2023 |          |                     | Meteorology decreased (increased) O <sub>3</sub> in 2016, 2018, 2021, 2023 (2017, 2019, 2020, 2022). |                  |
|             | Summer, 2016–2023 |          |                     | Meteorology decreased (increased) O <sub>3</sub> in 2020, 2021, 2023 (2016–2019, 2022).              |                  |
|             | Autumn, 2016–2023 |          |                     | Meteorology decreased (increased) O <sub>3</sub> in 2016–2017 (2018–2023).                           |                  |
|             | Winter, 2016–2023 |          |                     | Meteorology decreased (increased)O <sub>3</sub> in 2018–2020, 2022 (2016, 2017, 2021, 2023).         |                  |
| YRD         | Spring, 2014/2020 | WRF-Chem | FNL                 | $-0.89 \text{ ppb}$                                                                                  | Li et al., 2024  |
|             | Summer, 2014/2020 |          |                     | $+0.23 \text{ ppb}$                                                                                  |                  |
|             | Autumn, 2014/2020 |          |                     | $-2.74 \text{ ppb}$                                                                                  |                  |
|             | Winter, 2014/2020 |          |                     | $-3.86 \text{ ppb}$                                                                                  |                  |
| PRD         | Spring, 2013–2022 | MLR      | ERA5                | $+0.88 \text{ ppb yr}^{-1}$                                                                          | Cao et al., 2024 |
| YRD         | 2015–2022         | KZ-MLR   | ERA5                | The meteorological impacts account for an average of 71.8% of O <sub>3</sub>                         | Wu and An, 2025  |

<sup>a</sup> Symbol “–” means the continuous study period from the start year to the end year (left of –) to the end year (right of –); Symbol “/” means the discrete study period.

<sup>b</sup> The meteorological impact expressed by  $\text{ppb yr}^{-1}$  or  $\mu\text{g m}^{-3} \text{ yr}^{-1}$  means the trend from the start to end year of the study period. Meteorological impact expressed by  $\text{ppb}$ ,  $\mu\text{g m}^{-3}$  or % means the difference between the end year and start year (end year – start year).

81 **Table S2.** Summary of the meteorological variables from the ERA5, MERRA2, FNL and FNL025 reanalysis dataset used to establish MLR models.

| Abbreviations | Description                                                                           | Meteorological Dataset    |
|---------------|---------------------------------------------------------------------------------------|---------------------------|
| SLP           | Daily mean sea level pressure (hPa)                                                   | ERA5, MERRA2, FNL, FNL025 |
| TCCday        | Total cloud area fraction (%) averaged over 08:00 to 17:00 LT                         | ERA5, MERRA2              |
| PBLHday       | Planetary boundary layer height (m) averaged over 08:00 to 17:00 LT                   | ERA5, MERRA2, FNL, FNL025 |
| U10           | Daily mean 10-meter eastward wind ( $\text{m s}^{-1}$ )                               | ERA5, MERRA2, FNL, FNL025 |
| V10           | Daily mean 10-meter northward wind ( $\text{m s}^{-1}$ )                              | ERA5, MERRA2, FNL, FNL025 |
| T2max         | Daily maximum 2-meter air temperature ( $^{\circ}\text{C}$ )                          | ERA5, MERRA2, FNL, FNL025 |
| SSRDday       | Surface incoming shortwave flux ( $\text{W m}^{-2}$ ) averaged over 08:00 to 17:00 LT | ERA5, MERRA2              |
| TP            | Total precipitation ( $\text{mm day}^{-1}$ )                                          | ERA5, MERRA2              |
| PWAT          | Daily mean precipitable water considered as a single layer (mm)                       | FNL, FNL025               |
| RH2           | Daily mean 2-meter relative humidity (%)                                              | ERA5, MERRA2, FNL, FNL025 |
| V850          | Daily mean northward wind at 850 hPa ( $\text{m s}^{-1}$ )                            | ERA5, MERRA2, FNL, FNL025 |

82

**Table S3.** The 10-year trend in each meteorological factor used to establish MLR models from the ERA5, MERRA2, and FNL during four seasons.

| Season | Dataset | RH2<br>(% yr <sup>-1</sup> ) | U10<br>(m s <sup>-1</sup> yr <sup>-1</sup> ) | V10<br>(m s <sup>-1</sup> yr <sup>-1</sup> ) | SSRDday<br>(W m <sup>-2</sup> yr <sup>-1</sup> ) | PBLHday<br>(m yr <sup>-1</sup> ) | TCCday<br>(% yr <sup>-1</sup> ) | TP (mm day <sup>-1</sup> yr <sup>-1</sup> )<br>or<br>PWAT (mm yr <sup>-1</sup> ) | SLP<br>(hPa yr <sup>-1</sup> ) | T2max<br>(°C yr <sup>-1</sup> ) | V850<br>(m s <sup>-1</sup> yr <sup>-1</sup> ) |
|--------|---------|------------------------------|----------------------------------------------|----------------------------------------------|--------------------------------------------------|----------------------------------|---------------------------------|----------------------------------------------------------------------------------|--------------------------------|---------------------------------|-----------------------------------------------|
| Spring | ERA5    | +0.08                        | +0.01                                        | -0.00                                        | +0.68                                            | +3.89                            | +0.00                           | -0.02                                                                            | -0.02                          | +0.18                           | -0.01                                         |
|        | MERRA2  | +0.33                        | +0.01                                        | -0.00                                        | +1.59                                            | +5.54                            | +0.24                           | +0.02                                                                            | -0.08                          | +0.16                           | +0.00                                         |
|        | FNL     | +0.12                        | +0.01                                        | -0.01                                        | /                                                | +14.44                           | /                               | +0.20                                                                            | -0.09                          | +0.12                           | -0.01                                         |
| Summer | ERA5    | +0.18                        | -0.00                                        | +0.01                                        | -0.72                                            | -2.10                            | +0.18                           | +0.03                                                                            | +0.02                          | +0.08                           | +0.03                                         |
|        | MERRA2  | +0.35                        | +0.00                                        | +0.03                                        | +1.11                                            | -6.95                            | +0.29                           | -0.03                                                                            | -0.04                          | +0.04                           | +0.05                                         |
|        | FNL     | +0.29                        | -0.00                                        | +0.01                                        | /                                                | +4.96                            | /                               | +0.23                                                                            | -0.08                          | -0.01                           | +0.05                                         |
| Autumn | ERA5    | -0.17                        | +0.01                                        | -0.02                                        | -1.62                                            | +0.04                            | -0.21                           | -0.04                                                                            | +0.21                          | -0.10                           | -0.05                                         |
|        | MERRA2  | +0.11                        | +0.00                                        | -0.03                                        | -0.99                                            | -2.52                            | -0.17                           | -0.06                                                                            | +0.17                          | -0.12                           | -0.04                                         |
|        | FNL     | -0.29                        | +0.00                                        | -0.03                                        | /                                                | +6.66                            | /                               | -0.15                                                                            | +0.13                          | -0.16                           | -0.05                                         |
| Winter | ERA5    | +0.07                        | +0.00                                        | -0.00                                        | -0.03                                            | +2.71                            | +0.41                           | +0.00                                                                            | +0.04                          | +0.02                           | +0.03                                         |
|        | MERRA2  | +0.36                        | -0.01                                        | -0.01                                        | +0.68                                            | +5.29                            | +0.31                           | +0.01                                                                            | +0.00                          | +0.04                           | +0.04                                         |
|        | FNL     | +0.15                        | -0.01                                        | -0.01                                        | /                                                | +8.68                            | /                               | +0.12                                                                            | -0.03                          | +0.01                           | +0.03                                         |

## Reference

- Cao, T., Wang, H., Chen, X., Li, L., Lu, X., Lu, K., and Fan, S.: Rapid increase in spring ozone in the Pearl River Delta, China during 2013–2022, *npj Clim. Atmos. Sci.*, 7, 309, <https://doi.org/10.1038/s41612-024-00847-3>, 2024.
- Chen, L., Zhu, J., Liao, H., Yang, Y., and Yue, X.: Meteorological influences on PM<sub>2.5</sub> and O<sub>3</sub> trends and associated health burden since China's clean air actions, *Sci. Total Environ.*, 744, 140837, <https://doi.org/10.1016/j.scitotenv.2020.140837>, 2020.
- Dang, R., Liao, H., and Fu, Y.: Quantifying the anthropogenic and meteorological influences on summertime surface ozone in China over 2012–2017, *Sci. Total Environ.*, 754, 142394, <https://doi.org/10.1016/j.scitotenv.2020.142394>, 2021.
- Ding, D., Xing, J., Wang, S., Chang, X., and Hao, J.: Impacts of emissions and meteorological changes on China's ozone pollution in the warm seasons of 2013 and 2017, *Front. Environ. Sci. Eng.*, 13, <https://doi.org/10.1007/s11783-019-1160-1>, 2019.
- Ding, J., Dai, Q., Fan, W., Lu, M., Zhang, Y., Han, S., and Feng, Y.: Impacts of meteorology and precursor emission change on O<sub>3</sub> variation in Tianjin, China from 2015 to 2021, *J. Environ. Sci.*, 126, 506–516, <https://doi.org/10.1016/j.jes.2022.03.010>, 2023.
- Gao, D., Xie, M., Liu, J., Wang, T., Ma, C., Bai, H., Chen, X., Li, M., Zhuang, B., and Li, S.: Ozone variability induced by synoptic weather patterns in warm seasons of 2014–2018 over the Yangtze River Delta region, China, *Atmos. Chem. Phys.*, 21, 5847–5864, <https://doi.org/10.5194/acp-21-5847-2021>, 2021a.
- Gao, L., Wang, T., Ren, X., Ma, D., Zhuang, B., Li, S., Xie, M., Li, M., and Yang, X.-Q.: Subseasonal characteristics and meteorological causes of surface O<sub>3</sub> in different East Asian summer monsoon periods over the North China Plain during 2014–2019, *Atmos. Environ.*, 264, 118704, <https://doi.org/10.1016/j.atmosenv.2021.118704>, 2021b.
- Gong, S., Zhang, L., Liu, C., Lu, S., Pan, W., and Zhang, Y.: Multi-scale analysis of the impacts of meteorology and emissions on PM<sub>2.5</sub> and O<sub>3</sub> trends at various regions in China from 2013 to 2020 2. Key weather elements and emissions, *Sci. Total Environ.*, 824, 153847, <https://doi.org/10.1016/j.scitotenv.2022.153847>, 2022.
- Han, H., Liu, J., Shu, L., Wang, T., and Yuan, H.: Local and synoptic meteorological influences on daily variability in summertime surface ozone in eastern China, *Atmos. Chem. Phys.*, 20, 203–

222, <https://doi.org/10.5194/acp-20-203-2020>, 2020.

Hu, F., Xie, P., Xu, J., Lv, Y., Zhang, Z., Zheng, J., and Tian, X.: Long-term trends of ozone in the Yangtze River Delta, China: spatiotemporal impacts of meteorological factors, local, and non-local emissions, *J. Environ. Sci.*, S1001074224003826, <https://doi.org/10.1016/j.jes.2024.07.017>, 2024.

Ji, X., Hong, Y., Lin, Y., Xu, K., Chen, G., Liu, T., Xu, L., Li, M., Fan, X., Wang, H., Zhang, H., Chen, Y., Yang, C., Lin, Z., and Chen, J.: Impacts of Synoptic Patterns and Meteorological Factors on Distribution Trends of Ozone in Southeast China During 2015–2020, *J. Geophys. Res.: Atmos.*, 128, e2022JD037961, <https://doi.org/10.1029/2022JD037961>, 2023.

Li, K., Jacob, D. J., Shen, L., Lu, X., De Smedt, I., and Liao, H.: Increases in surface ozone pollution in China from 2013 to 2019: anthropogenic and meteorological influences, *Atmos. Chem. Phys.*, 20, 11423–11433, <https://doi.org/10.5194/acp-20-11423-2020>, 2020.

Li, M., Wang, T., Shu, L., Qu, Y., Xie, M., Liu, J., Wu, H., and Kalsoom, U.: Rising surface ozone in China from 2013 to 2017: a response to the recent atmospheric warming or pollutant controls?, *Atmos. Environ.*, 246, 118130, <https://doi.org/10.1016/j.atmosenv.2020.118130>, 2021.

Li, X., Yuan, B., Parrish, D. D., Chen, D., Song, Y., Yang, S., Liu, Z., and Shao, M.: Long-term trend of ozone in southern China reveals future mitigation strategy for air pollution, *Atmos. Environ.*, 269, 118869, <https://doi.org/10.1016/j.atmosenv.2021.118869>, 2022.

Li, Y., Wang, T., Wang, Q., Li, M., Qu, Y., Wu, H., and Xie, M.: Exploring the role of aerosol-ozone interactions on O<sub>3</sub> surge and PM<sub>2.5</sub> decline during the clean air action period in Eastern China 2014–2020, *Atmos. Res.*, 302, 107294, <https://doi.org/10.1016/j.atmosres.2024.107294>, 2024.

Lin, C., Lau, A. K. H., Fung, J. C. H., Song, Y., Li, Y., Tao, M., Lu, X., Ma, J., and Lao, X. Q.: Removing the effects of meteorological factors on changes in nitrogen dioxide and ozone concentrations in China from 2013 to 2020, *Sci. Total Environ.*, 793, 148575, <https://doi.org/10.1016/j.scitotenv.2021.148575>, 2021.

Liu, Y. and Wang, T.: Worsening urban ozone pollution in China from 2013 to 2017 – part 1: the complex and varying roles of meteorology, *Atmos. Chem. Phys.*, 20, 6305–6321, <https://doi.org/10.5194/acp-20-6305-2020>, 2020.

Liu, Y., Geng, G., Cheng, J., Liu, Y., Xiao, Q., Liu, L., Shi, Q., Tong, D., He, K., and Zhang, Q.:



Drivers of Increasing Ozone during the Two Phases of Clean Air Actions in China 2013–2020, *Environ. Sci. Technol.*, 57, 8954–8964, <https://doi.org/10.1021/acs.est.3c00054>, 2023.

Luo, Z., Lu, P., Chen, Z., and Liu, R.: Ozone Concentration Estimation and Meteorological Impact Quantification in the Beijing-Tianjin-Hebei Region Based on Machine Learning Models, *Earth Space Sci.*, 11, e2023EA003346, <https://doi.org/10.1029/2023EA003346>, 2024.

Ma, D., Wang, T., Wu, H., Qu, Y., Liu, J., Liu, J., Li, S., Zhuang, B., Li, M., and Xie, M.: The effect of anthropogenic emission, meteorological factors, and carbon dioxide on the surface ozone increase in China from 2008 to 2018 during the East Asia summer monsoon season, *Atmos. Chem. Phys.*, 23, 6525–6544, <https://doi.org/10.5194/acp-23-6525-2023>, 2023.

Mousavinezhad, S., Choi, Y., Pouyaei, A., Ghahremanloo, M., and Nelson, D. L.: A comprehensive investigation of surface ozone pollution in China, 2015–2019: separating the contributions from meteorology and precursor emissions, *Atmos. Res.*, 257, 105599, <https://doi.org/10.1016/j.atmosres.2021.105599>, 2021.

Ni, Y., Yang, Y., Wang, H., Li, H., Li, M., Wang, P., Li, K., and Liao, H.: Contrasting changes in ozone during 2019–2021 between eastern and the other regions of China attributed to anthropogenic emissions and meteorological conditions, *Sci. Total Environ.*, 908, 168272, <https://doi.org/10.1016/j.scitotenv.2023.168272>, 2024.

Pan, W., Gong, S., Lu, K., Zhang, L., Xie, S., Liu, Y., Ke, H., Zhang, X., and Zhang, Y.: Multi-scale analysis of the impacts of meteorology and emissions on PM<sub>2.5</sub> and O<sub>3</sub> trends at various regions in China from 2013 to 2020 3. Mechanism assessment of O<sub>3</sub> trends by a model, *Sci. Total Environ.*, 857, 159592, <https://doi.org/10.1016/j.scitotenv.2022.159592>, 2023.

Qian, J., Liao, H., Yang, Y., Li, K., Chen, L., and Zhu, J.: Meteorological influences on daily variation and trend of summertime surface ozone over years of 2015–2020: Quantification for cities in the Yangtze River Delta, *Sci. Total Environ.*, 834, 155107, <https://doi.org/10.1016/j.scitotenv.2022.155107>, 2022.

Shang, N., Gui, K., Zhao, H., Yao, W., Zhao, H., Zhang, X., Zhang, X., Li, L., Zheng, Y., Wang, Z., Wang, Y., Che, H., and Zhang, X.: Decomposition of meteorological and anthropogenic contributions to near-surface ozone trends in Northeast China (2013–2021), *Atmos. Pollut. Res.*, 14, 101841, <https://doi.org/10.1016/j.apr.2023.101841>, 2023.

Sun, L., Xue, L., Wang, Y., Li, L., Lin, J., Ni, R., Yan, Y., Chen, L., Li, J., Zhang, Q., and Wang, W.:

Impacts of meteorology and emissions on summertime surface ozone increases over central eastern China between 2003 and 2015, *Atmos. Chem. Phys.*, 19, 1455–1469, <https://doi.org/10.5194/acp-19-1455-2019>, 2019.

Sun, Y., Yin, H., Lu, X., Notholt, J., Palm, M., Liu, C., Tian, Y., and Zheng, B.: The drivers and health risks of unexpected surface ozone enhancements over the Sichuan Basin, China, in 2020, *Atmos. Chem. Phys.*, 21, 18589–18608, <https://doi.org/10.5194/acp-21-18589-2021>, 2021.

Wang, M., Chen, X., Jiang, Z., He, T.-L., Jones, D., Liu, J., and Shen, Y.: Meteorological and anthropogenic drivers of surface ozone change in the North China Plain in 2015–2021, *Sci. Total Environ.*, 906, 167763, <https://doi.org/10.1016/j.scitotenv.2023.167763>, 2024.

Wang, P., Guo, H., Hu, J., Kota, S. H., Ying, Q., and Zhang, H.: Responses of PM<sub>2.5</sub> and O<sub>3</sub> concentrations to changes of meteorology and emissions in China, *Sci. Total Environ.*, 662, 297–306, <https://doi.org/10.1016/j.scitotenv.2019.01.227>, 2019.

Weng, X., Forster, G. L., and Nowack, P.: A machine learning approach to quantify meteorological drivers of ozone pollution in China from 2015 to 2019, *Atmos. Chem. Phys.*, 22, 8385–8402, <https://doi.org/10.5194/acp-22-8385-2022>, 2022.

Wu, K., Wang, Y., Qiao, Y., Liu, Y., Wang, S., Yang, X., Wang, H., Lu, Y., Zhang, X., and Lei, Y.: Drivers of 2013–2020 ozone trends in the Sichuan Basin, China: impacts of meteorology and precursor emission changes, *Environ. Pollut.*, 300, 118914, <https://doi.org/10.1016/j.envpol.2022.118914>, 2022.

Wu, L. and An, J.: Quantitative impacts of meteorology and emissions on the long-term trend of O<sub>3</sub> in the YRD, China from 2015 to 2022, *J. Environ. Sci.*, 149, 314–329, <https://doi.org/10.1016/j.jes.2024.01.038>, 2025.

Yan, D., Jin, Z., Zhou, Y., Li, M., Zhang, Z., Wang, T., Zhuang, B., Li, S., and Xie, M.: Anthropogenically and meteorologically modulated summertime ozone trends and their health implications since China’s clean air actions, *Environ. Pollut.*, 343, 123234, <https://doi.org/10.1016/j.envpol.2023.123234>, 2024.

Yang, J., Liu, J., Han, S., Yao, Q., and Cai, Z.: Study of the meteorological influence on ozone in urban areas and their use in assessing ozone trends in all seasons from 2009 to 2015 in Tianjin, China, *Meteorol. Atmos. Phys.*, 131, 1661–1675, <https://doi.org/10.1007/s00703-019-00664-x>, 2019a.

- Yang, L., Luo, H., Yuan, Z., Zheng, J., Huang, Z., Li, C., Lin, X., Louie, P. K. K., Chen, D., and Bian, Y.: Quantitative impacts of meteorology and precursor emission changes on the long-term trend of ambient ozone over the Pearl River Delta, China, and implications for ozone control strategy, *Atmos. Chem. Phys.*, 19, 12901–12916, <https://doi.org/10.5194/acp-19-12901-2019>, 2019b.
- Yao, S., Wei, W., Cheng, S., Niu, Y., and Guan, P.: Impacts of meteorology and emissions on O<sub>3</sub> pollution during 2013–2018 and corresponding control strategy for a typical industrial city of China, *Atmosphere*, 12, 619, <https://doi.org/10.3390/atmos12050619>, 2021.
- Yao, T., Ye, H., Wang, Y., Zhang, J., Guo, J., and Li, J.: Kolmogorov-Zurbenko filter coupled with machine learning to reveal multiple drivers of surface ozone pollution in China from 2015 to 2022, *Sci. Total Environ.*, 949, 175093, <https://doi.org/10.1016/j.scitotenv.2024.175093>, 2024.
- Yin, H., Lu, X., Sun, Y., Li, K., Gao, M., Zheng, B., and Liu, C.: Unprecedented decline in summertime surface ozone over eastern China in 2020 comparably attributable to anthropogenic emission reductions and meteorology, *Environ. Res. Lett.*, 16, 124069, <https://doi.org/10.1088/1748-9326/ac3e22>, 2021.
- Yu, Y., Wang, Z., He, T., Meng, X., Xie, S., and Yu, H.: Driving factors of the significant increase in surface ozone in the Yangtze River Delta, China, during 2013–2017, *Atmos. Pollut. Res.*, 10, 1357–1364, <https://doi.org/10.1016/j.apr.2019.03.010>, 2019.
- Zhang, Y., Lei, R., Cui, S., Wang, H., Chen, M., and Ge, X.: Spatiotemporal trends and impact factors of PM<sub>2.5</sub> and O<sub>3</sub> pollution in major cities in China during 2015–2020, *Chin. Sci. Bull.*, 67, 2029–2042, <https://doi.org/10.1360/TB-2021-0767>, 2022.
- Zhao, N., Wang, G., Li, G., and Lang, J.: Trends in Air Pollutant Concentrations and the Impact of Meteorology in Shandong Province, Coastal China, during 2013–2019, *Aerosol Air Qual. Res.*, 21, 200545, <https://doi.org/10.4209/aaqr.200545>, 2021.
- Zheng, H., Kong, S., He, Y., Song, C., Cheng, Y., Yao, L., Chen, N., and Zhu, B.: Enhanced ozone pollution in the summer of 2022 in China: the roles of meteorology and emission variations, *Atmos. Environ.*, 301, 119701, <https://doi.org/10.1016/j.atmosenv.2023.119701>, 2023.
