# Supplementary material for: Meteorological influence on surface ozone trends in China: Assessing uncertainties caused by multi-dataset and multi-method
Source: Copernicus journal article supplement (doi:10.5194/egusphere-2025-1880), 2025-05-19
Supplement: Supplementary file [file egusphere-2025-1880-AC1-supplement.pdf]

## Response to Referee #1

This study presents an analysis of the meteorological drivers of surface ozone ( $O_3$ ) trends in China from 2013 to 2022, based on an observational dataset of ozone and various supporting analyses, including statistical analyses, simple machine-learning and chemical transport modeling using GEOS-Chem.

The authors highlight the role of meteorological conditions in driving seasonal and regional ozone increases, and use these analyses to begin a discussion of the uncertainties arising from applying these different supporting datasets. The paper will be of interest for those using such large-scale observational datasets to isolate the drivers of air quality trends and may be of interest to policymakers. The use of a consistent metric is interesting. The paper represents a significant effort in gathering and providing an interesting high-level analysis of different ways to analyse the data.

### Response:

We sincerely thank the referee for the decision and constructive comments. The manuscript has been revised accordingly, and our point-by-point responses are provided below. The referee's comments are shown in black, and our replies are highlighted in blue. A tracked-changes version of the revised manuscript is also clearly showing the changes made.

The main result of the study is to assess the consistency between approaches using a coefficient of variability metric, in which higher CVs indicate lower consistency of meteorologically driven  $O_3$  trends derived from different datasets or methods. Initially this is used as a comparator between datasets, but towards the end of the MS the authors use this more quantitatively, with thresholds of 0.5 and 1.0 being applied to indicate consistency. How were these numbers chosen? What do they mean?

### Response:

The CV eliminates the influence of dimensionality across different models by normalizing the standard deviation with the mean, thereby enabling meaningful comparisons of the dispersion degrees among various models. Mathematically, a "CV < 1" indicates that results from different models are closely clustered around the mean, signifying a high consistency across the models. Both Chen et al. (2019) and Wang et al. (2022) adopted a threshold of 1.0 for classifying variability levels. In this study, to more rigorously assess the uncertainties caused by multi-dataset and multi-method, we introduced an additional stringent threshold of 0.5. This refinement allows for a more nuanced demonstration of the consistency in multimodal results.

We have added the description on thresholds of 0.5 and 1.0 as follows: "To give a more quantitative assessment, consistency levels were classified as strong and weak with  $CV < 0.5$  and  $CV > 1.0$ , respectively (Wang et al., 2022a)." *[Lines 228–229 in the tracked-changes version of the revised manuscript]*

What other metrics could be used as a metric for comparison?

**Response:**

Besides CV, other widely used measures of spread include the range, inter-quartile range (IQR), and standard deviation (SD) (Chattamvelli and Shanmugam, 2023). The range and IQR, calculated as the difference between the maximum and minimum values, and the difference between the 75%-quartile and 25%-quartile, respectively, can be sensitive to outliers and heavy-tailed distributions (Högel et al., 1994). In contrast, SD quantifies total variation around the mean and is less responsive to tail behaviour. Compared to SD, the CV is a unit-free measure that expresses variation relative to the mean as a percentage.

We have added the following statement to clarify the advantages of CV over other metrics: "Compared to other comparators (e.g. range, inter-quartile range, and SD), the CV is a unit-free measure that quantifies percentage variation relative to the mean and is less sensitive to outliers and heavy-tailed distributions (Högel et al., 1994; Chattamvelli and Shanmugam, 2023)." *[Lines 225–227 in the tracked-changes version of the revised manuscript]*

Most time is spent discussing an analysis using meteorological reanalyses with the ML and CTM work in a supporting role as challenger methods to the MLR analysis. In section 2, the methods used are described. In the regression-based statistical analysis, the authors first use a time-series filter to retrieve trends in ozone and other fields, and then a MLR-based model to derive the drivers of these trends. I was not able to find further details of the method used as it is in a separate publication that is incorrectly referenced.

**Response:**

Following the Reviewer's suggestion, we have refined the description of the KZ-MLR methodology as follows: "After establishing MLR models for the short-term and baseline components in each season, we obtain their respective residual terms. The total residuals, which represent the sum of residuals from baseline variables and short-term variables, primarily reflect anthropogenic influences. We then applied a  $KZ_{(365,3)}$

filter to these aggregated residuals to derive long-term emission-driven and meteorology-driven O<sub>3</sub> variations. Finally, the meteorology-driven O<sub>3</sub> trends and emission-driven O<sub>3</sub> trends were obtained through Least Square Method." [Lines 146–150 in the tracked-changes version of the revised manuscript]

Additionally, we have revised the caption of Figure S1 to more clearly illustrate the KZ-MLR workflow.

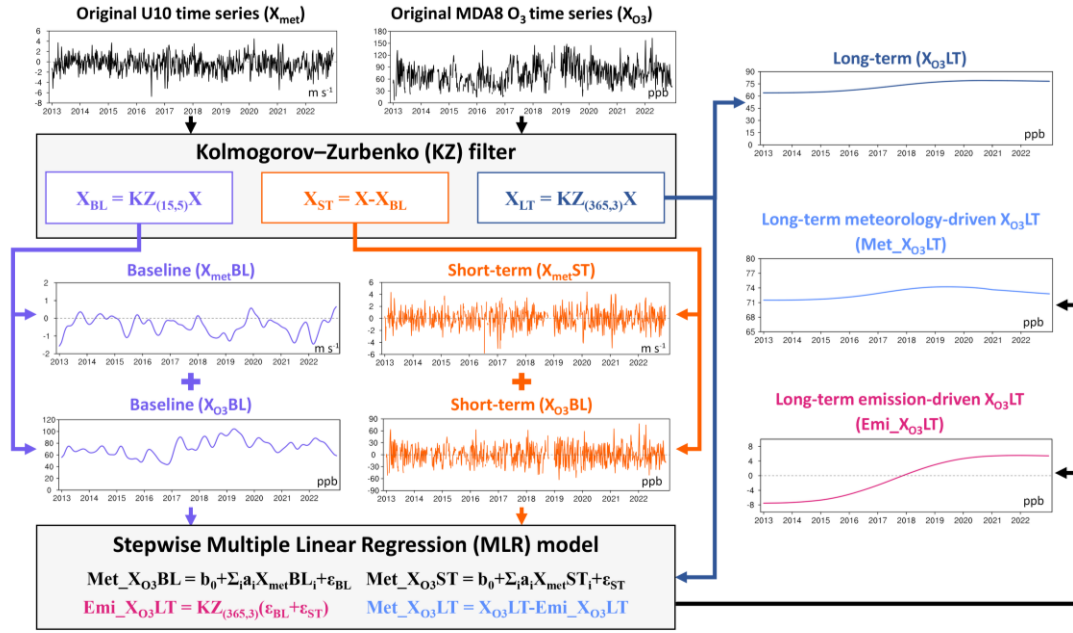

**Figure S1.** Flowchart of the Kolmogorov-Zurbenko - Multiple linear regression (KZ-MLR) model, which decomposes the observed MDA8 O<sub>3</sub> time series into meteorology-driven and emission-driven long-term components. Shown on the figure is an example: MDA8 O<sub>3</sub> data from Station\_1015A and U10 data from ERA5 during the summer.

The ML study is perhaps the least well justified - six of the predictors are proxies for time, with a further six (pressure, temp, wind speed, RH and PBLH) being deemed sufficient to capture the meteorological drivers of ozone. I have reservations about this approach because the RF model is trained on MDA8 O<sub>3</sub> concentrations. Are the authors satisfied that this model is sufficiently accurate that it can be used for attribution of driver and yield confident results? If so, what is the justification? What is the basis for explaining 50% of the variance to be a threshold for inclusion? I'd like to see more here, particularly the basis for exclusion of e.g. trends in emissions or atmospheric composition which may be drivers. It would seem much more appropriate if they had used RF to predict the recovered LT O<sub>3</sub> trend and then used the meteorological data as predictors for the trend.

**Response:**

Thank you for thoughtful comments regarding ML study. We would like to address the concern as follows:

- 1) Given the demonstrably limited impact of algorithmic differences in O<sub>3</sub>-Meteorology analyses (Wang et al., 2024a), we employ a RF-based weather normalisation framework, which is a validated method for quantifying meteorological influences on O<sub>3</sub> concentrations (Grange et al., 2018; Vu et al., 2019). Our predictor set integrates six temporal proxies (capturing long-term anthropogenic drivers including emission trends and atmospheric composition changes) with six key meteorological parameters (pressure, temperature, U10, V10, relative humidity, and PBLH) that demonstrably influence O<sub>3</sub> variability.
- 2) We maintain high confidence in the model's attribution capability, as it skillfully reconstructs observed MDA8 O<sub>3</sub> concentrations (Fig. S2b), achieving  $R^2 > 0.5$  at over 70% of state-controlled stations in all seasons, which is consistent with the 0.4–0.6 range reported in comparable studies (Weng et al., 2022; Lu et al., 2024). The  $R^2 > 0.5$  inclusion threshold represents a deliberate compromise between model reliability and spatial coverage, systematically excluding stations where RF performance could introduce significant attribution uncertainty (Varoquaux and Colliot, 2023).
- 3) For meteorological normalisation, we implement the protocol of Vu et al. (2019): daily meteorological variables undergo 1000 resampling iterations from  $\pm 14$ -day observational windows while temporal proxies remain fixed. The mean predicted O<sub>3</sub> under average meteorological conditions refers to the emission-driven concentration. The residual (the difference between observation and emission-driven O<sub>3</sub>) constitutes the meteorology-driven component, with its long-term trends derived through  $KZ_{(365,3)}$  filter followed by Least Square Method. This integrated methodology robustly separates meteorological and anthropogenic drivers.
- 4) We have added the statement on  $R^2$  as follows: "Over 70% of state-controlled stations showed  $R^2 > 0.5$  in all seasons (Fig. S2b), which is consistent with the 0.4–0.6 range reported in comparable studies (Weng et al., 2022; Lu et al., 2024). Stations with  $R^2 < 0.5$  were excluded to avoid significant attribution uncertainty that could be introduced by the RF performance." *[Lines 171–173 in the tracked-changes version of the revised manuscript]*
- 5) More details about the RF model were also added as follows: "For meteorological

normalisation, we implemented the protocol of Vu et al. (2019). Meteorological variables were resampled by randomly selecting data from the two weeks before and after the specified date, while temporal proxies remained fixed. To derive the de-weathered MDA8 O<sub>3</sub> concentration for a given day (e.g. March 1, 2013), the random resampling process was iterated 1000 times. The mean predicted O<sub>3</sub> under average meteorological conditions, which refers to de-weathered O<sub>3</sub>, corresponds to the emission-driven O<sub>3</sub> concentration. The meteorology-driven MDA8 O<sub>3</sub> concentrations for each season were computed as the difference between observed concentrations and de-weathered concentrations. Detailed processes were shown in Fig. S2(a). The  $KZ_{(365,3)}$  filter was then applied to obtain long-term components, and meteorology-driven O<sub>3</sub> trends were derived using Least Square Method." *[Lines 179–187 in the tracked-changes version of the revised manuscript]*

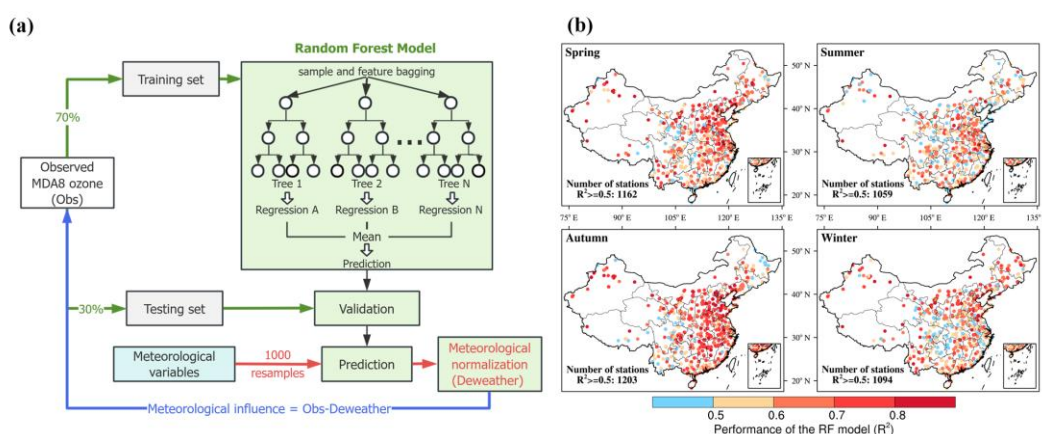

**Figure S2.** (a) Conceptual diagram of obtaining the meteorological influence based on the Random Forest (RF) algorithm, and (b) the performance of the RF model for the testing dataset at each state-controlled station during four seasons. The number of state-controlled monitoring stations with the coefficient of determination ( $R^2$ ) greater than or equal to 0.5 is also presented.

L167 specifies how MDA8 was calculated, but needs much more detail on how the trends were computed.

### Response:

Trends in this study were all calculated using the Least Square Method. We have added the corresponding statement in Sections 2.2.2, 2.2.3, and 2.2.4. *[Lines 150, 187, 215 in the tracked-changes version of the revised manuscript]*

The use of GEOS-Chem is interesting and the experiment is well-conceived, and the model is well validated in the supporting information. No information on the extraction

of the trend data from the GC experiments is given, and this should be included in the main MS.

**Response:**

Following the Reviewer's suggestion, we have added the information on the extraction of the trend data from the GC experiments as follows: "The FixE2013 simulation is designed to obtain the MDA8 O<sub>3</sub> concentrations driven solely by meteorological changes and further quantify the meteorological influence on O<sub>3</sub> variations in four seasons. After applying the  $KZ_{(365,3)}$  filter to derive the long-term meteorology-driven series, trends were calculated through Least Square Method."

*[Lines 213–216 in the tracked-changes version of the revised manuscript]*

The MERRA2 reanalysis was used to drive the CTM. Given the scope of the MS, why just one reanalysis? It seems that there's an opportunity here to expand the analysis of the uncertainty in the GC trend on meteorological product, and it is certainly necessary to discuss how the lack of independence of the GC and MLR (MERRA2) results affects the analysis in this paper.

**Response:**

Thank you for the suggestion. We would like to address the concern as follows:

- 1) To our knowledge, GEOS-Chem is conventionally driven by meteorological inputs from NASA's Global Modeling and Assimilation Office (GMAO) Goddard Earth Observing System (GEOS), such as MERRA2. MERRA2 currently represents the latest and most widely adopted NASA/GMAO reanalysis product. Consequently, utilizing MERRA2 to drive GEOS-Chem aligns with established methodological practices in the field. Employing alternative meteorological fields (e.g. ERA5 or FNL) would necessitate converting these datasets into formats compatible with GEOS-Chem, which is a process requiring substantial time investment and posing technical challenges.
- 2) Furthermore, a key objective of this study is assessing uncertainties in quantifying meteorological impacts arising from the use of different datasets. This objective is addressed through MLR models driven by MERRA2, ERA5, and FNL. Thus, additional simulations using alternative reanalyses to drive GEOS-Chem were deemed beyond the scope of this work.
- 3) While prior studies (e.g. using WRF-CMAQ) have explored reanalysis-dependent variability in the CTM (Wang et al., 2024b), such investigations remain limited for GEOS-Chem.
- 4) We fully acknowledge the value of your suggestion and intend to pursue this avenue

in future research by systematically evaluating different reanalysis products within the GEOS-Chem framework.

Section 3.1 details the results, and leaves some questions unanswered. Please include a discussion of what the analysis says about which are the main drivers, etc. At present, this discussion is more of a comparison with other findings. In fact, the authors note that most of the outcomes are already published elsewhere (L214-L223), which reinforces the need for novel analysis in this section. I believe the MS would be improved by reporting drivers of the trends, particularly as Section 3.2 lumps all these drivers together as the meteorological impact on the MDA8 O<sub>3</sub> trends. Maybe a figure showing the contribution of each driver would be useful here.

**Response:**

We appreciate your constructive comments regarding driver analysis in Section 3.1. As established in Section 1, O<sub>3</sub> variations are primarily modulated by emissions and meteorology. Our manuscript therefore employs a structured analytical progression: Section 3.1 characterizes observed O<sub>3</sub> trends in China through comparison with previous studies, establishing the essential context for subsequent driver attribution. This foundational approach intentionally precedes Sections 3.2–3.3, where we assess the uncertainty in meteorology-driven O<sub>3</sub> trends caused by multi-dataset and multi-method, and further conduct driver quantification.

The current framework ensures our core focus—systematic uncertainty analysis in meteorology-driven O<sub>3</sub> trends, which can remain central while maintaining a clear separation between observational benchmarking and driver attribution. Introducing attribution results prematurely in Section 3.1 would disrupt this logical flow and create redundancy, particularly since comprehensive driver contributions were already visualized in Figure 5 (Section 3.2).

To strengthen narrative coherence and enhance analytical continuity, we have added the following transitional statement in Section 3.1: "As mentioned in Section 1, variations in O<sub>3</sub> concentrations are fundamentally modulated by emissions and meteorology. This section mainly documents observed O<sub>3</sub> trends, and the quantitative contributions of emissions and meteorology to MDA8 O<sub>3</sub> variations will be discussed in Section 3.2." *[Lines 249–251 in the tracked-changes version of the revised manuscript]*

Section 3.2 addresses the consistency of the MLR results across different reanalyses. I



don't understand why the uncertainty in the derived trends is not included here. Could it not be calculated? I suggest it's included, not least to visually assess the consistency/difference between calculated trends and support the CV analysis. If it can be calculated, please add it as an error bar to the figure.

**Response:**

Thanks! Following the Reviewer's suggestion, we have now incorporated error bars into Figure 3 and Figure 6 to address the uncertainty in the derived trends. Corresponding descriptions of the error bar methodology is detailed in the updated figure captions: "Error bars indicate  $\pm 1$  standard deviation (SD) of site-level trends calculated from all available monitoring stations within each region."

We have added the following description about error bars:

"with the multi-dataset mean trends ranging from  $+0.19 (\pm 0.47)$  ppb yr<sup>-1</sup> to  $+0.55 (\pm 0.45)$  ppb yr<sup>-1</sup>." *[Line 264 in the tracked-changes version of the revised manuscript]*

"with trends ranging from  $+0.47 (\pm 0.47)$  ppb yr<sup>-1</sup> to  $+0.71 (\pm 0.59)$  ppb yr<sup>-1</sup>" *[Line 265 in the tracked-changes version of the revised manuscript]*

"During summer and autumn, meteorological influences on O<sub>3</sub> show the greater spatial heterogeneity (with higher SD) and larger variability among multi-datasets (with higher CV)." *[Lines 267–268 in the tracked-changes version of the revised manuscript]*

"the multi-dataset mean trends ranged from  $+0.09 (\pm 0.38)$  ppb yr<sup>-1</sup> to  $+0.33 (\pm 0.13)$  ppb yr<sup>-1</sup> in BTH,  $+0.18 (\pm 0.20)$  ppb yr<sup>-1</sup> to  $+0.68 (\pm 0.56)$  ppb yr<sup>-1</sup> in YRD, and  $+0.73 (\pm 0.36)$  ppb yr<sup>-1</sup> to  $+1.13 (\pm 0.45)$  ppb yr<sup>-1</sup> in PRD" *[Lines 278–279 in the tracked-changes version of the revised manuscript]*

"In the other three seasons, the multi-method mean trends, ranging from  $+0.17 (\pm 0.37)$  ppb yr<sup>-1</sup> to  $+0.26 (\pm 0.27)$  ppb yr<sup>-1</sup>, are 1.1 to 2.1 times lower than those computed by the three dataset-driven MLR models (Fig. 3a)" *[Lines 339–341 in the tracked-changes version of the revised manuscript]*

"multi-method mean trends of  $+0.17 (\pm 0.08)$  to  $+0.47 (\pm 0.22)$  ppb yr<sup>-1</sup> and  $+0.10 (\pm 0.12)$  to  $+0.83 (\pm 0.19)$  ppb yr<sup>-1</sup>" *[Lines 351–352 in the tracked-changes version of the revised manuscript]*

"In BTH, the three models perform consistently well only in winter, with meteorology-driven O<sub>3</sub> trends ranging from  $+0.09 (\pm 0.07)$  ppb yr<sup>-1</sup> to  $+0.26 (\pm 0.15)$  ppb yr<sup>-1</sup> and a CV of 0.55." *[Lines 355–357 in the tracked-changes version of the revised manuscript]*



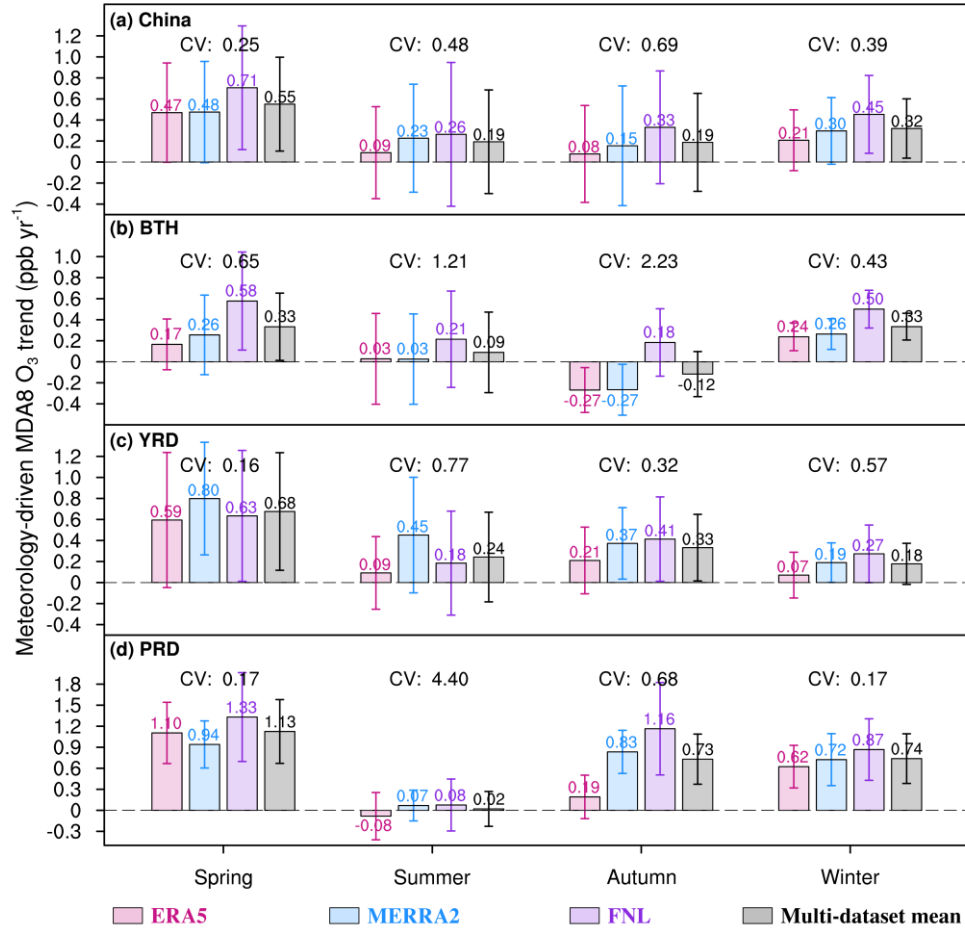

**Figure 3.** Meteorology-driven MDA8 O<sub>3</sub> trends in (a) the whole China, (b) BTH, (c) YRD, and (d) PRD during four seasons. Values in red, blue, and purple represent trends calculated by ERA5-, MERRA2-, and FNL-driven multiple linear regression (MLR) model, respectively. The fourth black bar represents the multi-dataset mean trend. Error bars indicate ±1 standard deviation (SD) of site-level trends calculated from all available monitoring stations within each region. The absolute value of the coefficient of variation (CV) for each season is also shown.

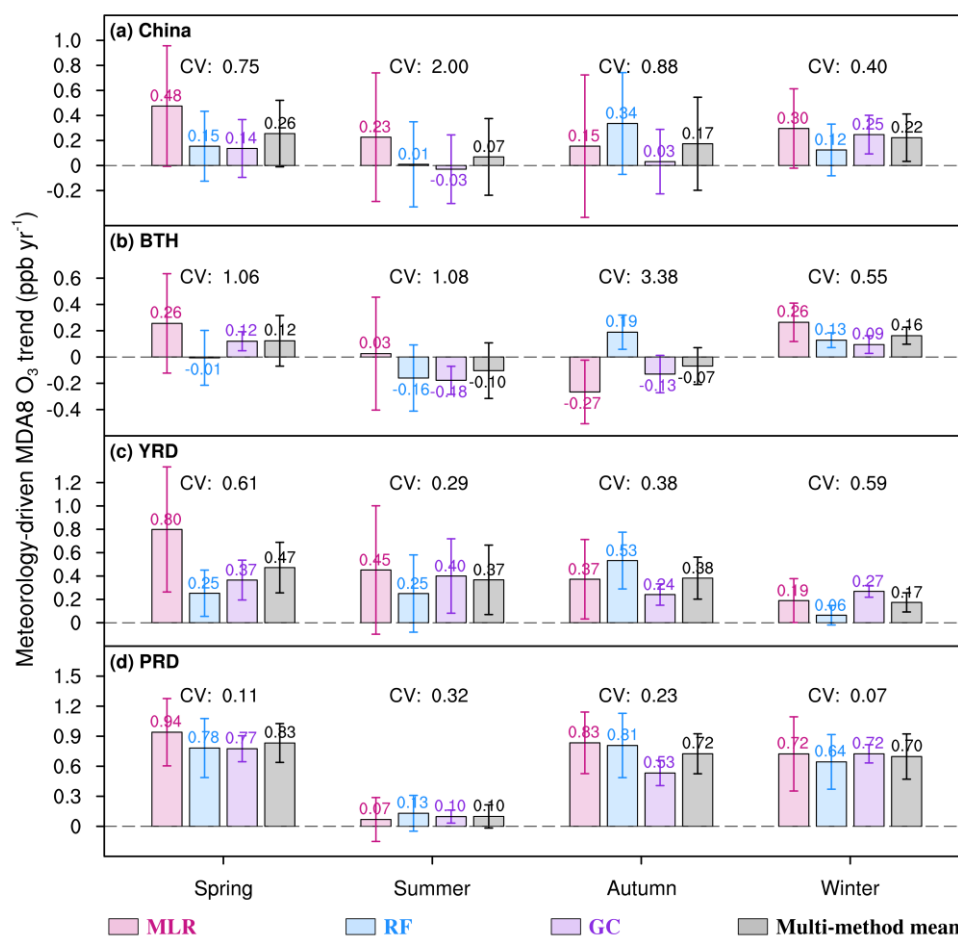

**Figure 6.** Meteorology-driven MDA8 O<sub>3</sub> trends in (a) the whole China, (b) BTH, (c) YRD, and (d) PRD during four seasons. Values in red, blue, and purple represent trends calculated by multiple linear regression (MLR), random forest (RF), and GEOS-Chem (GC) models, respectively. The fourth black bar represents the multi-method mean trend. Error bars indicate  $\pm 1$  standard deviation (SD) of site-level trends calculated from all available monitoring stations within each region. The absolute value of the coefficient of variation (CV) for each season is also shown.

Section 3.3 confronts the MLR method with its challengers. Here the MS inter-compares the metrics and notes the difference across various domains. This provides a brief description of the uncertainty (ie spread) of results but stops short of providing a good assessment of the importance of individual drivers or in making broad recommendations as to which analysis is the most robust, reliable or useful. The analysis of the FNL results is interesting. My main concern here is with the ML/RF approach: it may be undermined by relatively low skill of the resulting model and resulting first-principles questions as to the robustness of these results - does a statistical model of relatively low skill permit us to say much about the drivers?

## Response:

Thank you for your insightful comments regarding the multi-method analyses in Section 3.3. We would like to address the concern as follows:

- 1) Following the Reviewer's suggestion, we have made broad recommendations as follows: "To obtain a more reliable estimate, it is recommended to use MERRA2 reanalysis dataset due to its eclectic result (Fig. 3) and avoid using FNL because of the uncertainty brought by PBLH when separating meteorological and anthropogenic influences on O<sub>3</sub> concentrations in China." *[Lines 332–334 in the tracked-changes version of the revised manuscript]* and "The trends driven by RF model are eclectic in more cases (Fig. 6) and recommended to isolate meteorological and anthropogenic drivers." *[Lines 375–376 in the tracked-changes version of the revised manuscript]*
- 2) The RF model's robustness was rigorously established through both model performance assessment (over 70% of state-controlled stations exhibited  $R^2 > 0.5$  across all seasons) and consistency with previous studies on RF-based separation of meteorological influences. We are therefore confident that the insights derived from the RF model provide a meaningful foundation for evaluating meteorological influences on O<sub>3</sub> concentrations. See more details in our reply to the fourth comment above.
- 3) While our current focus is quantifying uncertainties in meteorology-driven O<sub>3</sub> trends caused by multi-method, we agree that deeper interrogation of individual drivers (e.g. temperature, wind speed, relative humidity) is essential. Future work will employ Lindeman-Merenda-Gold (LMG) indices to quantitatively resolve the contributions of specific meteorological variables, thereby strengthening mechanistic interpretations of O<sub>3</sub> variations.
- 4) Following the Reviewer's suggestion, we have expanded the limitation discussion in Section 4 as follows: "Finally, the Lindeman-Merenda-Gold indices can be employed to quantitatively resolve the contributions of specific meteorological variables. The mechanistic understanding of O<sub>3</sub> drivers would be improved by integrating additional variables, such as solar radiation, soil moisture, and climate indices (e.g. El Niño-Southern Oscillation)." *[Lines 401–403 in the tracked-changes version of the revised manuscript]*

Overall, the MS has a number of positive qualities: the use multi-dataset and multi-method approaches is welcome. The MS shows that the analysis is quite robust for some

regions and some seasons, and so has some policy relevance.

**Response:**

Thank you again for your positive comments on our manuscript.

The MS would be much improved if the analysis was extended to identify the drivers of the what the authors call uncertainty, ie intermodel spread. At present, the MS doesn't give enough information on how the ML and GC data were used to compute trends, and whether it was as statistically advanced as for the reanalysis data, separating processes at different timescales. In short, if the comparison is between similar quantities.

**Response:**

Following the Reviewer's suggestion, we have clarified the computational procedures as follows to enhance methodological transparency and ensure comparable trend quantification across approaches.

For the ML model (Section 2.2.3), we now explicitly state: "The  $KZ_{(365,3)}$  filter was then applied to obtain long-term components, and meteorology-driven  $O_3$  trends were derived using Least Square Method." *[Lines 186–187 in the tracked-changes version of the revised manuscript]*

For the GC model (Section 2.2.4), we specify: "The FixE2013 simulation is designed to obtain the MDA8  $O_3$  concentrations driven solely by meteorological changes and further quantify the meteorological influence on  $O_3$  variations in four seasons. After applying the  $KZ_{(365,3)}$  filter to derive the long-term meteorology-driven series, trends were calculated through Least Square Method." *[Lines 213–216 in the tracked-changes version of the revised manuscript]*

The application of identical  $KZ_{(365,3)}$  filter and trend-calculation techniques to both ML-derived and GEOS-Chem isolated components ensures inter-model comparability.

It would be interesting to discuss the limitations of working with reanalysis datasets, and indeed the relative strengths and weaknesses of ML and GC data in deriving trends for comparison with observations. The ML and MLR analysis would be stronger if the role of additional chemical, meteorological and climate variables were included to capture a fuller picture of ozone drivers, e.g. solar radiation, soil moisture, vegetation cover, or climate indices like ENSO in driving uncertainty was quantified. Similarly, clustering techniques would be valuable to augment the region based approach and would provide better understanding of the similarity between stations.

**Response:**

Thank you for your insightful suggestions. Following your suggestion, we have expanded the limitation discussion in Section 4 as follows:

"While this study advances understanding of meteorological contributions to O<sub>3</sub> trends, several limitations warrant attention in future work. Though the reanalysis meteorological dataset is generated observationally, inherent constraints exist, including parameterization uncertainties affecting O<sub>3</sub>-relevant physical processes (Janjić et al., 2018; Davidson and Millstein, 2022) and resolution constraints.

Regarding analytical approaches, machine learning efficiently captures nonlinear O<sub>3</sub>-meteorology relationships without requiring explicit physicochemical parameterizations, enabling scalable multi-site analysis. However, its inability to resolve chemical mechanisms and sensitivity to predictor selection remain key constraints. Conversely, while GEOS-Chem mechanistically resolves chemistry-transport interactions and enables source attribution, it propagates uncertainties from emission inventories and chemical mechanisms into trend estimates.

Future studies could be improved in the following ways: First, more meteorological datasets and methods should be used to provide more robust uncertainty quantification in O<sub>3</sub>-meteorology analyses. Second, implementing clustering techniques (e.g. K-means algorithm) could identify sub-regional drivers at ecotones, enhancing spatial resolution beyond our regional framework. Finally, the Lindeman-Merenda-Gold indices can be employed to quantitatively resolve the contributions of specific meteorological variables. The mechanistic understanding of O<sub>3</sub> drivers would be improved by integrating additional variables, such as solar radiation, soil moisture, and climate indices (e.g. El Niño-Southern Oscillation). Clustering techniques would be valuable to augment the region-based approach and would provide better understanding of the similarity between stations." *[Lines 388–405 in the tracked-changes version of the revised manuscript]*

To enhance its impact, in broad terms, I'd suggest to provide more detailed justifications for their methods, expand the analysis to include additional variables and uncertainties, and focus on identifying the main drivers of ozone trends. By addressing these points, the value of the study would be increased for researchers and policymakers working to mitigate ozone pollution under changing meteorological conditions.

**Response:**

We sincerely appreciate your overarching recommendations for enhancing this

study's scientific and policy impact. In response, we have comprehensively strengthened methodological descriptions throughout the manuscript (e.g. Lines 125–133, 146–150, 171–187 in the tracked-changes version of the revised manuscript), systematically expanded the limitation discussion in Section 4 (e.g. Lines 389–405 in the tracked-changes version of the revised manuscript), and refined driver attribution narratives (e.g. Lines 329–333, 375–376 in the tracked-changes version of the revised manuscript) to better support policy applications. We are confident these revisions significantly enhance the scholarly rigor and practical relevance of our work.

Finally, regarding data availability, the data do not conform to Copernicus policy which states that "access to data is by depositing them (as well as related metadata) in FAIR-aligned reliable public data repositories, assigning digital object identifiers, and properly citing data sets as individual contributions.". This needs to be addressed via a DOI via archiving through Zenodo or similar of the entire O<sub>3</sub> dataset.

**Response:**

Thank you for highlighting this important requirement. In full compliance with Copernicus policy, we have deposited the complete research data, including surface MDA8 O<sub>3</sub> observations, and results derived from MLR, RF, and GEOS-Chem analyses in Zenodo. These data are now publicly accessible via <https://doi.org/10.5281/zenodo.15859028>.

We have added the following new statement to the Data Availability section: "The MDA8 O<sub>3</sub> observations and analytical results derived from MLR, RF, and GEOS-Chem can be obtained from <https://doi.org/10.5281/zenodo.15859028>." *[Lines 447–448 in the tracked-changes version of the revised manuscript]*

Minor comments

L31 rapid not repaid

**Response:**

The typo has been revised. *[Line 32 in the tracked-changes version of the revised manuscript]*

L266 uncertainties caused by multi-model is not clear. How are they caused? what is 'multi-model' in this context?

**Response:**

We wish to clarify that the term "multi-dataset" (rather than "multi-model") appears in Line 266, referring specifically to the use of three meteorological reanalysis products (MERRA2, ERA5, and FNL) to drive MLR models. The calculated uncertainties shown by CV values are caused by the use of different meteorological reanalysis products (MERRA2, ERA5, and FNL).

L296 interesting, but please add reasons why PBLH in FNL introduces these issues.

**Response:**

The planetary boundary layer (PBL) serves as the primary interface where exchanges of heat, water, momentum, and mass occur between the free atmosphere and the Earth's surface. The intricate interplay between PBL turbulence and the vertical structure of thermodynamic variables presents a substantial challenge in determining the planetary boundary layer height (PBLH) (Teixeira et al., 2021). Consequently, uncertainties in PBLH within reanalysis datasets may stem from the adoption of divergent PBLH derivation methodologies. As suggested by Guo et al. (2021), when validating PBLH, the NCEP FNL dataset tends to be more vulnerable to the impacts of complex underlying surfaces compared to ERA5 and MERRA2.

We have added the reason as follows: "and that its performance may be constrained by complex underlying terrain and static instability (Guo et al., 2021)." *[Lines 329–330 in the tracked-changes version of the revised manuscript]*

L300 should read 'for the whole of China'

**Response:**

The usage has been modified. *[Line 338 in the tracked-changes version of the revised manuscript]*

**References:**

Chattamvelli, R., Shanmugam, R. Measures of Spread. In: Descriptive Statistics for Scientists and Engineers. Synthesis Lectures on Mathematics & Statistics. Springer, Cham. [https://doi.org/10.1007/978-3-031-32330-0\\_3](https://doi.org/10.1007/978-3-031-32330-0_3), 2019

Chen, L., Gao, Y., Zhang, M., Fu, J. S., Zhu, J., Liao, H., Li, J., Huang, K., Ge, B., Wang, X., Lam, Y. F., Lin, C.-Y., Itahashi, S., Nagashima, T., Kajino, M., Yamaji, K., Wang, Z., and Kurokawa, J.: MICS-Asia III: multi-model comparison and evaluation of aerosol over East Asia, Atmos. Chem. Phys., 19, 11911–11937,



<https://doi.org/10.5194/acp-19-11911-2019>, 2019.

Davidson, M. R. and Millstein, D.: Limitations of reanalysis data for wind power applications, *Wind Energy*, 25, 1646–1653, <https://doi.org/10.1002/we.2759>, 2022.

Grange, S. K., Carslaw, D. C., Lewis, A. C., Boleti, E., and Hueglin, C.: Random forest meteorological normalisation models for Swiss PM<sub>10</sub> trend analysis, *Atmos. Chem. Phys.*, 18, 6223–6239, <https://doi.org/10.5194/acp-18-6223-2018>, 2018.

Guo, J., Zhang, J., Yang, K., Liao, H., Zhang, S., Huang, K., Lv, Y., Shao, J., Yu, T., Tong, B., Li, J., Su, T., Yim, S. H. L., Stoffelen, A., Zhai, P., and Xu, X.: Investigation of near-global daytime boundary layer height using high-resolution radiosondes: first results and comparison with ERA5, MERRA-2, JRA-55, and NCEP-2 reanalyses, *Atmos. Chem. Phys.*, 21, 17079–17097, <https://doi.org/10.5194/acp-21-17079-2021>, 2021.

Högel, J., Schmid, W., and Gaus, W.: Robustness of the standard deviation and other measures of dispersion, *Biom. J.*, 36, 411–427, <https://doi.org/10.1002/bimj.4710360403>, 1994.

Janjić, T., Bormann, N., Bocquet, M., Carton, J. A., Cohn, S. E., Dance, S. L., Losa, S. N., Nichols, N. K., Potthast, R., Waller, J. A., and Weston, P.: On the representation error in data assimilation, *Q. J. R. Meteorolog. Soc.*, 144, 1257–1278, <https://doi.org/10.1002/qj.3130>, 2018.

Lu, X., Liu, Y., Su, J., Weng, X., Ansari, T., Zhang, Y., He, G., Zhu, Y., Wang, H., Zeng, G., Li, J., He, C., Li, S., Amnuaylojaroen, T., Butler, T., Fan, Q., Fan, S., Forster, G. L., Gao, M., Hu, J., Kanaya, Y., Latif, M. T., Lu, K., Nédélec, P., Nowack, P., Sauvage, B., Xu, X., Zhang, L., Li, K., Koo, J.-H., and Nagashima, T.: Tropospheric ozone trends and attributions over east and southeast Asia in 1995–2019: an integrated assessment using statistical methods, machine learning models, and multiple chemical transport models, <https://doi.org/10.5194/egusphere-2024-3702>, 17 December 2024.

Teixeira, J., Piepmeier, J. R., Nehrir, A. R., Ao, C. O., Chen, S. S., Clayson, C. A., Fridlind, A. M., Lebsock, M., McCarty, W., Salmun, H., Santanello, J. A., Turner, D. D., Wang, Z., and Zeng, X.: Toward a global planetary boundary layer observing system: the NASA PBL incubation study team report, NASA PBL Incubation Study Team, 134

pp, 2021

Varoquaux, G., Colliot, O.: Evaluating Machine Learning Models and Their Diagnostic Value. In: Colliot, O. (eds) Machine Learning for Brain Disorders. Neuromethods, 197. Humana, New York, NY. [https://doi.org/10.1007/978-1-0716-3195-9\\_20](https://doi.org/10.1007/978-1-0716-3195-9_20), 2023

Vu, T. V., Shi, Z., Cheng, J., Zhang, Q., He, K., Wang, S., and Harrison, R. M.: Assessing the impact of clean air action on air quality trends in Beijing using a machine learning technique, Atmos. Chem. Phys., 19, 11303–11314, <https://doi.org/10.5194/acp-19-11303-2019>, 2019.

Wang, M., Chen, X., Jiang, Z., He, T.-L., Jones, D., Liu, J., and Shen, Y.: Meteorological and anthropogenic drivers of surface ozone change in the North China Plain in 2015–2021, Sci. Total Environ., 906, 167763, <https://doi.org/10.1016/j.scitotenv.2023.167763>, 2024a.

Wang, T., Li, N., Li, Y., Lin, H., Yao, N., Chen, X., Li Liu, D., Yu, Q., and Feng, H.: Impact of climate variability on grain yields of spring and summer maize, Comput. Electron. Agric., 199, 107101, <https://doi.org/10.1016/j.compag.2022.107101>, 2022.

Wang, X., Jiang, L., Guo, Z., Xie, X., Li, L., Gong, K., and Hu, J.: Influence of meteorological reanalysis field on air quality modeling in the Yangtze River Delta, China, Atmos. Environ., 318, 120231, <https://doi.org/10.1016/j.atmosenv.2023.120231>, 2024b.

Weng, X., Forster, G. L., and Nowack, P.: A machine learning approach to quantify meteorological drivers of ozone pollution in China from 2015 to 2019, Atmos. Chem. Phys., 22, 8385–8402, <https://doi.org/10.5194/acp-22-8385-2022>, 2022.
